# Supplementary material for: At the edge of chaos: a prospective multiple case study in Australian general practices adapting to COVID-19
Source: PubMed Central journal article supplement — BMJ Open. 2023 Jan 18;13(1):e064266. doi: 10.1136/bmjopen-2022-064266 (PMC9852738; doi:10.1136/bmjopen-2022-064266), 2023-01-18
Supplement: bmjopen-2022-064266.draft_revisions.pdf [file bmjopen-2022-064266.draft_revisions.pdf]

# BMJ Open

BMJ Open is committed to open peer review. As part of this commitment we make the peer review history of every article we publish publicly available.

When an article is published we post the peer reviewers' comments and the authors' responses online. We also post the versions of the paper that were used during peer review. These are the versions that the peer review comments apply to.

The versions of the paper that follow are the versions that were submitted during the peer review process. They are not the versions of record or the final published versions. They should not be cited or distributed as the published version of this manuscript.

BMJ Open is an open access journal and the full, final, typeset and author-corrected version of record of the manuscript is available on our site with no access controls, subscription charges or pay-per-view fees (<http://bmjopen.bmj.com>).

If you have any questions on BMJ Open's open peer review process please email [info.bmjopen@bmj.com](mailto:info.bmjopen@bmj.com)

# BMJ Open

## At the Edge of Chaos: Changing routines in Australian General Practices in response to COVID-19

|                               |                                                                                                                                                                                                                                                                                                                                                                                                                                                                                                                                                                                                                                                                                                                                                                                                                                                                                                                                                                                      |
|-------------------------------|--------------------------------------------------------------------------------------------------------------------------------------------------------------------------------------------------------------------------------------------------------------------------------------------------------------------------------------------------------------------------------------------------------------------------------------------------------------------------------------------------------------------------------------------------------------------------------------------------------------------------------------------------------------------------------------------------------------------------------------------------------------------------------------------------------------------------------------------------------------------------------------------------------------------------------------------------------------------------------------|
| Journal:                      | <i>BMJ Open</i>                                                                                                                                                                                                                                                                                                                                                                                                                                                                                                                                                                                                                                                                                                                                                                                                                                                                                                                                                                      |
| Manuscript ID                 | bmjopen-2022-064266                                                                                                                                                                                                                                                                                                                                                                                                                                                                                                                                                                                                                                                                                                                                                                                                                                                                                                                                                                  |
| Article Type:                 | Original research                                                                                                                                                                                                                                                                                                                                                                                                                                                                                                                                                                                                                                                                                                                                                                                                                                                                                                                                                                    |
| Date Submitted by the Author: | 28-Apr-2022                                                                                                                                                                                                                                                                                                                                                                                                                                                                                                                                                                                                                                                                                                                                                                                                                                                                                                                                                                          |
| Complete List of Authors:     | <p>Russell, Grant; Monash University, School of Primary Health Care Lane, Riki; Monash University, School of Primary Health Care; Monash Health, Gender Clinic</p> <p>Neil, Jennifer; Monash University, School of Primary Health Care</p> <p>Advocat, Jenny; Monash University, Department of General Practice</p> <p>Sturgiss, Elizabeth; Monash University, Department of General Practice; The Australian National University, National Centre for Epidemiology and Population Health</p> <p>Staunton-Smith, Timothy; Monash University, School of Primary Health Care</p> <p>Alexander, Karyn; Monash University Faculty of Medicine Nursing and Health Sciences</p> <p>Hattle, Simon; Monash University Faculty of Medicine Nursing and Health Sciences</p> <p>Crabtree, Benjamin; Rutgers Robert Wood Johnson Medical School, Department of Family Medicine and Community Health, Research Division</p> <p>Miller, William; Lehigh Valley Health Network, Family Medicine</p> |
| Keywords:                     | PRIMARY CARE, Health policy < HEALTH SERVICES ADMINISTRATION & MANAGEMENT, Change management < HEALTH SERVICES ADMINISTRATION & MANAGEMENT, VIROLOGY                                                                                                                                                                                                                                                                                                                                                                                                                                                                                                                                                                                                                                                                                                                                                                                                                                 |
|                               |                                                                                                                                                                                                                                                                                                                                                                                                                                                                                                                                                                                                                                                                                                                                                                                                                                                                                                                                                                                      |

SCHOLARONE™  
Manuscripts

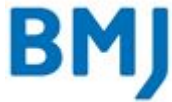

I, the Submitting Author has the right to grant and does grant on behalf of all authors of the Work (as defined in the below author licence), an exclusive licence and/or a non-exclusive licence for contributions from authors who are: i) UK Crown employees; ii) where BMJ has agreed a CC-BY licence shall apply, and/or iii) in accordance with the terms applicable for US Federal Government officers or employees acting as part of their official duties; on a worldwide, perpetual, irrevocable, royalty-free basis to BMJ Publishing Group Ltd ("BMJ") its licensees and where the relevant Journal is co-owned by BMJ to the co-owners of the Journal, to publish the Work in this journal and any other BMJ products and to exploit all rights, as set out in our [licence](#).

The Submitting Author accepts and understands that any supply made under these terms is made by BMJ to the Submitting Author unless you are acting as an employee on behalf of your employer or a postgraduate student of an affiliated institution which is paying any applicable article publishing charge ("APC") for Open Access articles. Where the Submitting Author wishes to make the Work available on an Open Access basis (and intends to pay the relevant APC), the terms of reuse of such Open Access shall be governed by a Creative Commons licence – details of these licences and which [Creative Commons](#) licence will apply to this Work are set out in our licence referred to above.

Other than as permitted in any relevant BMJ Author's Self Archiving Policies, I confirm this Work has not been accepted for publication elsewhere, is not being considered for publication elsewhere and does not duplicate material already published. I confirm all authors consent to publication of this Work and authorise the granting of this licence.

1  
2  
3 Title page  
4  
5

6 **At the Edge of Chaos: Changing routines in Australian General Practices in response to**  
7  
8 **COVID-19**  
9

10  
11 Grant Russell<sup>1</sup> MBBS, PhD Professor of Primary Care Research  
12

13  
14 Riki Lane<sup>1</sup> PhD Research Fellow  
15

16  
17 Jennifer Neil<sup>1</sup> MBBS(Hons) Clinical Educator  
18

19  
20 Jenny Advocat<sup>4</sup> PhD, Research Fellow  
21

22  
23 Elizabeth Sturgiss<sup>4</sup> MBBS, PhD Senior Research Fellow  
24

25  
26 Tim Staunton Smith MBBS Clinical Educator  
27

28  
29 Karyn Alexander<sup>1</sup>, MBChB, PhD Clinical Educator  
30

31  
32 Simon Hattle<sup>1</sup>, MBBS (Hons) Clinical Educator  
33

34  
35 Benjamin F. Crabtree<sup>2</sup>, PhD Distinguished Professor  
36

37  
38 William L Miller<sup>3</sup>, MD Professor of Family Medicine  
39

40  
41 1 Department of General Practice, Monash University  
42

43  
44 2 Department of Family Medicine and Community Health, Rutgers Robert Wood Johnson Medical School  
45

46  
47 3 Department of Family Medicine, Lehigh Valley Health Network  
48

49  
50 4 School of Primary and Allied Health Care, Monash University.  
51

52  
53 **Corresponding author** Grant Russell. Building 1, 270 Ferntree Gully Rd, Notting Hill 3168, Victoria,  
54 Australia. Mobile: +61 400467310 Email: grant.russell@monash.edu  
55

56  
57  
58 **Word count** for the main text (excluding title page, abstract, strengths and limitations, abbreviations,  
59 tables, references, figure) 3982.  
60

## Abstract

**Objectives:** The rapid onset and progressive course of the COVID-19 pandemic challenged primary care practices to generate rapid solutions to unique circumstances; creating a natural experiment of effectiveness, resilience, financial stability and governance across primary care models. We aimed to characterize how primary care practices in Melbourne Australia modified clinical and organizational routines in response to the COVID-19 pandemic in 2020-21 and identify factors that influenced these changes.

**Design:** Prospective qualitative case study design using a theory-informed participatory approach, conducted between April 2020 and February 2021. Participant general practitioner (GP) investigators designed the study and were involved in recruitment, development of structured practice summaries and data analysis.

**Setting:** The case sites were six Melbourne primary care practices of varying size and organizational models.

**Participants:** Potential participants were approached by GP investigators. Social scientists interviewed practice health care workers on three occasions. Practice members provided feedback on presentations of preliminary findings.

**Results:** We conducted 58 interviews with 26 practice health care workers including practice owners, practice managers, GPs, receptionists, and nurses; and six interviews with GP Investigators. Data saturation was achieved at the level of each practice and across the sample. The pandemic generated changes to triage, clinical care, infection control and organizational routines, particularly around telehealth. While collaboration and trust increased within several practices, others fragmented, leaving staff isolated and demoralized. Financial and organizational stability, collaborative problem solving, creative leadership, and communication (internally and within the broader healthcare sector) were major influences on practices' ability to negotiate the pandemic.

1  
2  
3 **Conclusions:** This study demonstrates the complex influences on primary care practices,  
4  
5 and reinforces the strengths of clinician participation in research design, conduct and  
6  
7 analysis. Two implications are: telehealth, triage and infection management innovations  
8  
9 are likely to continue; the existing payments system provides inadequate support to  
10  
11 primary care in a global pandemic.  
12  
13

#### 14 15 Strengths and limitations of this study 16

- 17  
18  
19 ► Our prospective case study design provided a detailed understanding of the evolution of clinical  
20  
21 and organisational routines within Australian general practices of varying models through the first  
22  
23 year of the COVID-19 pandemic.  
24  
25  
26 ► Our use of GPs as participant investigators overcame the challenges of recruiting and collecting  
27  
28 data from practices at a time when external researchers were unable to enter practices due to  
29  
30 public health restrictions.  
31  
32  
33 ► The credibility of our findings are increased by the multi-method data collection strategy  
34  
35 (providing a detailed, intensive exploration of individuals and organisations in context) and our  
36  
37 presentation of emergent findings to practice teams.  
38  
39  
40 ► Practices were all from Melbourne, the region in Australia that experienced both the highest  
41  
42 COVID case numbers and most prolonged and extensive lockdowns during 2020.  
43  
44  
45 ► Different practice routines may have emerged in other contexts, such as rural practices and those  
46  
47 with no association with a University Department of General Practice.  
48  
49  
50  
51  
52  
53  
54  
55  
56  
57  
58  
59  
60

**Abbreviations**

|      |                                       |
|------|---------------------------------------|
| AOD  | Alcohol and other drug                |
| CALD | Culturally and linguistically diverse |
| CDM  | Chronic disease management            |
| CHC  | Community Health Centre               |
| FTE  | Full Time Equivalent                  |
| GP   | General Practitioner                  |
| CDM  | Chronic disease management            |
| MBS  | Medical Benefits Schedule             |
| N    | Nurse                                 |
| PPE  | Personal Protective Equipment         |
| PM   | Practice manager                      |
| PO   | Practice owner                        |
| R    | Reception staff                       |
| SES  | Socio-economic status                 |

## INTRODUCTION

The COVID-19 pandemic has challenged healthcare systems<sup>1</sup> and generated major changes in the delivery of primary care.<sup>2</sup> While Australia was spared high COVID-19 mortality during 2020,<sup>3</sup> two-thirds of 2020 COVID cases and nearly 90% of deaths were in the Melbourne metropolitan region (population 5.1 million), following a four-month outbreak. In response, between July and October 2020, the Victorian state government imposed one of the world's most stringent lockdowns.<sup>4</sup>

Both federal and state governments in Australia stressed the importance of primary care to the overall pandemic response. Australian primary care is largely delivered through a network of small, owner-operated general practices. Ten percent of practices are owned by large corporate entities,<sup>5</sup> and most states have a small number of comprehensive primary health care organizations, similar to Community Health Centers (CHCs) in other nations.<sup>6</sup> Under Australia's federal government single-payer insurance scheme, the Medical Benefits Schedule (MBS), general practitioners (GPs) are paid a standard amount for each consultation, and can either accept that payment ("bulk-bill"), or charge an additional "co-payment" to the patient.

While complex systems such as primary care are generally robust,<sup>7</sup> situations of instability can generate an 'edge of chaos' state between *"equilibrium and complete disorder where systems have the potential to be most adaptive and creative"*,<sup>8</sup> but where *"systems that do not successfully change can become extinct"*.<sup>9</sup> The early phase of the pandemic generated such a scenario within Australian general practice.

There is limited research on the experiences of primary care practices providing care within the systemic strains caused by the pandemic. We asked: a) what changes to clinical and organizational routines were made during the first year of the pandemic; and b) what contextual, organizational and individual factors facilitated these changes?



## METHODS

**Design:** We used a participatory prospective qualitative case study<sup>10</sup> design, within which GP participant investigators shaped the project, and contributed to data collection and analysis.<sup>11</sup> Our methodology (including data collection tools) has been detailed elsewhere.<sup>12</sup>

**Setting and participants:** The study was set in six general practices of varying size and organizational model in metropolitan Melbourne. Practices were locations where GP investigators based their clinical work. Investigators comprised four clinician educators (JN, KA, SH and TSS), two clinician researchers (GR and ES) and two social science research fellows (JA and RL) with PhDs and experience in qualitative research. Each investigator was affiliated with a University Department of General Practice. WM and BC acted as external advisors. The GP investigators gained written informed consent from each participant. Data were collected between April 2020 and February 2021.

**Data collection** The GP investigators used structured diaries to record their experiences. They completed a practice description tool;<sup>13, 14</sup> and collated and photographed practice documents, signage and layout. RL and JA conducted semi-structured, in-depth, audio recorded telephone or videoconference interviews (30-60 minutes) with clinicians and administrative staff from each practice at three time points (see Figure 1). Each GP investigator was interviewed once in early 2021. Interviews focused upon participants' individual experiences, perceived practice responses, and beliefs about factors influencing practice performance. Practice staff were invited to attend live video presentations by investigators of emerging findings at mid and end of project. Responses were collected and informed analysis.

1  
2  
3 **Data management:** All digital data was stored on a secure server only accessible by JA, RL  
4  
5 and project manager SC. Interviews were professionally transcribed and all identifying  
6  
7 information removed. Interview transcripts and observational data (diaries, practice  
8  
9 documents and field notes) were coded by JA and RL using NVivo<sup>12,15</sup> Our iterative coding  
10  
11 template was based on emerging data themes and concepts from Miller, et al's  
12  
13 Relationship Centred Model of Primary Care Practice Development.<sup>16</sup>  
14  
15

16  
17 **Data analysis:** Data analysis used a constant comparative approach<sup>17</sup> informed by prior  
18  
19 approaches to investigation of primary care practice routines.<sup>14,18</sup> JA and RL undertook data  
20  
21 analysis, which was refined at regular meetings with GR and JN, and at a data retreat<sup>19</sup> with  
22  
23 all investigators.  
24  
25

26  
27 The use of matrices facilitated cross case comparisons.<sup>20</sup> An initial matrix organized summarized data  
28  
29 under thematic codes (rows) versus practices (columns). Subsequently, further summarized matrices  
30  
31 were used to generate narratives, which described the key elements of changes in each practice.  
32  
33 Reporting followed Standards for Reporting Qualitative Research.<sup>21</sup>  
34  
35

36  
37 **Public and patient involvement statement:** Given limitations imposed by the pandemic on  
38  
39 interaction with members of the community, this research was carried out without patient  
40  
41 involvement  
42  
43

## 44 45 **RESULTS**

46  
47 We recruited six of seven practices approached. One practice was part of a federal and state funded  
48  
49 Community Health Centre, another was part of a large corporate network and the remainder were  
50  
51 general practices of varying size, organizational structure, billing practices and patient  
52  
53 characteristics. (See Table 1). All were organizationally and financially stable prior to the pandemic.  
54  
55 We conducted 58 interviews with 26 practice staff including practice owners (PO), practice managers  
56  
57 (PM), GPs, reception staff (R), and nurses (N) and six interviews with GP Investigators. Data  
58  
59  
60

saturation was achieved at the level of each practice and across the sample. The CHC-based investigator left the practice in August 2020. Subsequently, another GP working at the practice provided liaison, but did not collect data.

| PRACTICE PSEUDONYM | TYPE OF PRACTICE                                | LOCATION                  | BILLING SYSTEM <sup>1</sup> | PRACTICE POPULATION                                                     | GPS                | NURSES             | ALLIED HEALTH DISCIPLINES                                                                 |
|--------------------|-------------------------------------------------|---------------------------|-----------------------------|-------------------------------------------------------------------------|--------------------|--------------------|-------------------------------------------------------------------------------------------|
| <b>CHC</b>         | Community Health Centre                         | Inner city suburbs        | Bulk billing                | Lower SES <sup>2</sup> , CALD <sup>3</sup> , refugees, AOD <sup>4</sup> | 6 FTE <sup>5</sup> | 5                  | Numerous health and social care disciplines                                               |
| <b>SE1</b>         | Private General Practice                        | South-eastern suburbs     | Blended                     | High SES, children and elderly                                          | 3.5 FTE            | 2                  | Dentist                                                                                   |
| <b>E</b>           | Private General Practice                        | Eastern suburbs           | Blended                     | High SES, very few CALD                                                 | 4-5 FTE            | 1 FTE (3 in total) | Diabetes educator                                                                         |
| <b>CBD</b>         | Private General Practice                        | Central business district | Blended                     | Higher SES, Tourists, Multi-lingual GPs                                 | 3.5 FTE            | 1 FTE (2 in total) | Clinical psychology                                                                       |
| <b>SE2</b>         | Private General Practice within large corporate | South-eastern suburbs     | Bulk billing                | Mid to low SES, broad patient mix                                       | 14 FTE             | 3.5FTE             | Physiotherapy, dietetics                                                                  |
| <b>W</b>           | General Practice and Health Hub                 | Western suburbs           | Blended                     | Low SES, gentrifying                                                    | 15+ GPs            | 3.5 FTE            | Numerous co-located disciplines including psychology, dietetics, physiotherapy, podiatry. |

Table 1. Participating practices

1 Bulk billing is where clinicians accept the Medicare benefit as full payment for the service. A blended system is where clinicians bulk bill some patients and require a co-payment from others.

2 SES: socio-economic status.

3 CALD: culturally and linguistically diverse patients.

4 AOD: alcohol and other drug patients

5 FTE: Full time equivalent

1  
2  
3 Clinical and organizational routines evolved with the stages of the pandemic, patient  
4 demand and changes to MBS telehealth payments. Pre-pandemic plans required for  
5 practice accreditation prior to 2020 had minimal influence, and practices struggled with  
6 conflicting advice from government and professional organizations at times. Stability of the  
7 practice core, functional leadership, organizational model and communication were major  
8 influences on the ability of practices to modify routines to complex and unpredictable  
9 challenges. We begin by describing the evolution of the pandemic within the practices,  
10 followed by an interpretation of the drivers of routine change.  
11  
12  
13  
14  
15  
16  
17  
18  
19  
20

### 21 **Early chaos (February 2020 - April 2020)**

22 Practices began to be aware of the pandemic's implications in February 2020:  
23

24  
25  
26  
27 *We expected to be overwhelmed with very sick people and we were basing that*  
28 *on what was happening in other countries... we had plans for home palliation,*  
29 *staggered staff shifts in case one shift was infected and the Health Department*  
30 *ordered everyone on that shift to disappear, so week on, week off. (CHC GP2)*  
31  
32  
33  
34  
35  
36

37 The subsequent weeks were chaotic, as workplaces changed overnight:  
38

39  
40 *For two weeks at the very beginning, like early-mid March, it was absolute chaos.*  
41 *Just in terms of the volume of patients that were calling non-stop. Mostly phone*  
42 *calls, and mostly people really desperately wanting testing.... At first it was like*  
43 *very overwhelming, but then it became a new norm to just, "This is the new thing.*  
44 *Do it. Adapt, adapt, adapt." (CBD R)*  
45  
46  
47  
48  
49  
50

51 Many staff became increasingly frustrated by shortages of Personal Protective Equipment  
52 (PPE) and changing advice from government and professional bodies. They were concerned  
53 for their safety and that of their families and about the potential impact of rapid  
54 community transmission. The MBS broadened eligibility for telehealth consultations  
55  
56  
57  
58  
59  
60

1  
2  
3 (previously limited to rural and remote areas), allowing some older GPs and other  
4  
5 vulnerable staff to work from home, which increased the complexity of receptionists' work.  
6  
7

### 8 ***Emerging stability (May 2020 - June 2020)***

9

10 With cases falling, Victoria's community lockdown was lifted in late May. After the early  
11  
12 disruption, the impact was less than feared:  
13  
14

15  
16 *The initial tension, anxiety, shock where people saw the horrendous news items*  
17  
18 *from overseas: you could sense that in the doctors here, and the staff. ... so*  
19  
20 *initially there was a run for shelter.. ... People feel as if things are well controlled*  
21  
22 *and reasonably calm at the moment in terms of illness. (SE2 GP)*  
23  
24  
25

26 All practices had incorporated fundamental changes to their work routines (see Table 2):  
27

28 i) *Keeping staff and patients safe.* Once problems sourcing PPE were partially resolved,  
29  
30 practices began to prioritise creation of a COVID-19 safe workplace. Clinicians began  
31  
32 wearing scrubs, room ventilation and cleaning was improved and physical barriers and  
33  
34 isolation areas were introduced. These came with major changes in screening, triage and  
35  
36 booking routines. Online appointment booking was paused – reception staff screened all  
37  
38 patients for COVID-19 infection risk by telephone, while informing them about  
39  
40 requirements relating to safety, telehealth and billing. These infection control approaches  
41  
42 varied between practices.  
43  
44  
45

46 ii) *Re-aligned clinical work.* Telehealth had major impacts on clinical care delivery.  
47

48 Telephone, rather than video, consultations predominated due to GP preferences and  
49  
50 some patient technological constraints. There was significant concern about patient  
51  
52 unwillingness to attend in person, and GPs often viewed telehealth as inadequate for  
53  
54 delivering quality care, especially for systematic chronic disease management (CDM).  
55  
56  
57  
58  
59  
60

1  
2  
3 *iii) Practice management.* To limit virus transmission risk, practice staff began  
4  
5 communicating differently with each other. (See Table 3) Face to face meetings ceased,  
6  
7 replaced by emails, and in some practices, smart phone apps and virtual meetings. Formal  
8  
9 practice meetings were mostly held infrequently. Practice owners in the small private  
10  
11 practices made decisions to change routines, often unilaterally. GPs became increasingly  
12  
13 concerned about losing income due to reduced patient demand and an initial government  
14  
15 mandate to bulk bill all telehealth consultations.  
16  
17  
18  
19  
20

| WORKFLOW ROUTINE                         | DEFINITION                                                                            | DESCRIPTION OF CHANGES                                                                                                                                                                                                                                                                                                                                                                                                                                                                                                                                                                                                                                      |
|------------------------------------------|---------------------------------------------------------------------------------------|-------------------------------------------------------------------------------------------------------------------------------------------------------------------------------------------------------------------------------------------------------------------------------------------------------------------------------------------------------------------------------------------------------------------------------------------------------------------------------------------------------------------------------------------------------------------------------------------------------------------------------------------------------------|
| <b>1 KEEPING STAFF AND PATIENTS SAFE</b> | Procedures to reduce infectious disease transmission                                  | <p>Increased PPE use; enhanced cleaning practices by external cleaners and practice staff.</p> <p>Patient waiting routines e.g. changed waiting room layout; wait in their car/outside until appointment times.</p> <p>Booking processes: All practices paused patient ability to make appointments online. Receptionists began to check respiratory symptoms and travel/contact history during patient booking for appointments by telephone and on arrival.</p> <p>Staff-to staff contact reduced greatly: such as closed lunch rooms, lunch to be eaten in rooms and in some practices the wearing of surgical scrubs. (<i>Impacts on routine 3</i>)</p> |
| <b>2 RE-ALIGNED CLINICAL WORK</b>        |                                                                                       |                                                                                                                                                                                                                                                                                                                                                                                                                                                                                                                                                                                                                                                             |
| <b>2.1 TELEHEALTH</b>                    | Procedures for conducting consultations via phone or video, rather than face to face. | <p>All practices began using telehealth for many consultations – enabled by changed MBS funding for telehealth (previously limited to rural and remote areas).</p> <p>All practices remained open for face to face consultations (usually with almost all GPs on site). Most GPs provided telehealth from the practice, but some worked from home when isolating or unwell or if they had personal risk factors such as advanced age or chronic disease:</p> <ul style="list-style-type: none"> <li>• Difficulties due to lack of required technology at home;</li> </ul>                                                                                   |

|                                                                    |                                                                         |                                                                                                                                                                                                                                                                                                                                                                                                                                                                                                                                                                                                       |
|--------------------------------------------------------------------|-------------------------------------------------------------------------|-------------------------------------------------------------------------------------------------------------------------------------------------------------------------------------------------------------------------------------------------------------------------------------------------------------------------------------------------------------------------------------------------------------------------------------------------------------------------------------------------------------------------------------------------------------------------------------------------------|
|                                                                    |                                                                         | <p>providing access to patient data base, printing, faxing and billing.</p> <ul style="list-style-type: none"> <li>At CHC all but two GPs worked from home; management provided home technology.</li> </ul> <p>GPs overwhelmingly used phone rather than video:</p> <ul style="list-style-type: none"> <li>Reluctance to use video due to difficulties with logistics, practices' technology, and perceived ability for patients and/or GP to access and use technology.</li> </ul> <p>Receptionists needed to be aware of significantly modified billing schedule.</p>                               |
| <p><b>2.2 CASE MANAGEMENT CHRONIC ILLNESS/ CARE CONTINUITY</b></p> | <p>Procedures for management of patients' ongoing health conditions</p> | <p>All practices initially paused: Chronic Disease Management recalls; cervical cancer screening; 45-49 and 75+ year old health checks:</p> <ul style="list-style-type: none"> <li>Major concerns about missed diagnosis with telehealth and patient reluctance to attend GP and/or hospital.</li> </ul> <p>Different approaches and timing for resuming chronic disease management follow ups – often financially driven in view of falling practice income:</p> <ul style="list-style-type: none"> <li>Primarily conducted via phone or video with the assistance of the practice nurse.</li> </ul> |
| <p><b>3) PRACTICE MANAGEMENT</b></p>                               | <p>Procedures for coordination between practice staff</p>               | <p>Staff meetings: Pre-existing large variation between practices in frequency and attendance:</p> <p>Shift to online meetings: excludes some, but includes others.</p> <p>Some practices increased meetings, others decreased them.</p> <p>Major loss in collegiality:</p> <p>Infection control obstructs social interaction and makes it more difficult to gain second opinions from practice colleagues.</p> <p>Especially where many staff work from home (as in the CHC)</p> <p>Online forums, meetings, phone calls assist, but exclude non-GPs in some practices.</p>                          |

Table 2. Workflow routines

| Practice | Meeting routines                                                                                                  |                                                                                                                                                    |                                                                                                                  |                                                                    | Communication Tools                                                                                                                                                           |
|----------|-------------------------------------------------------------------------------------------------------------------|----------------------------------------------------------------------------------------------------------------------------------------------------|------------------------------------------------------------------------------------------------------------------|--------------------------------------------------------------------|-------------------------------------------------------------------------------------------------------------------------------------------------------------------------------|
|          | Pre COVID                                                                                                         | Early Chaos                                                                                                                                        | Emerging Stability                                                                                               | 2 <sup>nd</sup> Wave                                               |                                                                                                                                                                               |
| CHC      | Monthly / as required- all staff                                                                                  | Twice weekly                                                                                                                                       | Weekly Zoom (open to all staff, most attend, even on days off for some). Increased attendance from pre-pandemic. | As previous                                                        | Set up WhatsApp group at start of COVID-19 (for general staff communication)                                                                                                  |
| SE1      | GPs every 2 to 3 months, decided by owner.                                                                        | Weekly Zoom from May 2020. Generated by employed doctor advocacy.                                                                                  | Weekly Zoom – only GPs.                                                                                          | As previous                                                        | WhatsApp group for GPs at start of COVID-19                                                                                                                                   |
| E        | Every 1 or 2 months                                                                                               | Fortnightly by zoom; Nurses and receptionists not usually included                                                                                 | No change                                                                                                        | At peak of 2nd Wave, no meetings; leadership making all decisions. | Most communication by email                                                                                                                                                   |
| CBD      | Monthly                                                                                                           | Weekly, sometimes only GPs, sometimes Nurses. Also smaller informal meetings amongst GPs every morning                                             | Nurses stopped attending                                                                                         | As previous                                                        | WhatsApp group prior to COVID-19 but used more often during pandemic. WeChat group added.                                                                                     |
| SE2      | No all-staff meetings - off site managers only, no GP meetings, reception and nursing team have separate meetings | 1 GP meeting in March 2020, clinical investigator stepped up to clinical director, started regular meetings of PM, head nurse and medical director | No change                                                                                                        | No change                                                          | Medical director set up WhatsApp group for GPs in July to communicate changes to protocols, share thoughts, information - informal, not seen as good replacement for meetings |



|   |                                                                 |                                 |                                                 |             |                                                                                |
|---|-----------------------------------------------------------------|---------------------------------|-------------------------------------------------|-------------|--------------------------------------------------------------------------------|
| W | Partners meet 1-2 times a month, GPs monthly lunch meeting, AGM | All staff weekly or fortnightly | No practice wide meetings since late March 2020 | As previous | Couple of WhatsApp groups, delegated nurse and doctor inactive during COVID-19 |
|---|-----------------------------------------------------------------|---------------------------------|-------------------------------------------------|-------------|--------------------------------------------------------------------------------|

Table 3. Practice meetings and communication.

### ***Negotiating a second wave (July 2020 – October 2020)***

In early July, rapidly increasing cases led to a strict four-month metropolitan Melbourne lockdown.<sup>22</sup> Despite case numbers reaching 700 per day, many participants across the practices felt their earlier changes had prepared them for the challenge. Clinicians became increasingly concerned about missed diagnoses and late presentations:

*[A patient has] really deteriorated in the last six weeks. ... I've had several telephone calls to persuade him to go into hospital, and eventually he did yesterday. I got him to agree to some blood tests... his liver has packed up. And he's jaundiced and I don't know if he will survive, but at least he's gone in. And if he hadn't have gone in, I would have said, "Oh no, what do I do now?" ... He would have died at home. (CHC GP1)*

Patients embraced telehealth, causing dilemmas for clinicians in maintaining quality care as a 'balance' between bringing patients to a potentially infectious location and dealing with the uncertainties of remote clinical care:

*We've put all sort of strict guidelines around what we think's suitable for telehealth and what's not. So, things like say mental health plans, basic administrative things like repeat scripts...referrals to other specialists... do that over the phone. But as soon as they start saying, "I've got abdominal pain," or,*

1  
2  
3 *"I've got this thing on my arm, I'm not sure what it is," they've got to come in and*  
4 *have an appointment. (SE1 PO)*  
5  
6  
7

8  
9 Three practices began managing COVID-19 testing clinics:

10  
11 *... we took over screening [from the Department of Health, because] They were*  
12 *taking up to two weeks to get a positive result to a patient. ... that was a*  
13 *significant increase in workload.... I pretty much worked seven days a week. I*  
14 *think for three months I didn't have a day off, there were just lots of results*  
15 *coming through, notifications. The time taken to notify one positive result, to*  
16 *notify the Department of Health, could take one staff member two to three*  
17 *hours .... (CHC GP2)*  
18  
19  
20  
21  
22  
23  
24  
25  
26  
27

28 As the lockdown continued, financial pressures increased. New staff vacancies were  
29 unfilled, and some staff and clinicians were asked to take annual leave or reduce working  
30 hours. The privately owned practices sought to diversify income; training nurses in remote  
31 CDM, systematically calling patients for recall (most practices); or providing COVID-19  
32 testing for asymptomatic travellers (CBD). The corporate's regional management modified  
33 CDM 'targets' to increase income. As cases rose, the CHC assumed responsibility for  
34 managing the pandemic response at nearby public housing towers, which required  
35 significant staffing resources and eventually attracted additional state government funding.  
36  
37  
38  
39  
40  
41  
42  
43  
44  
45

#### 46 ***Entering a new normal (November 2020 – February 2021)***

47

48  
49 Strict lockdown ended in late October 2020 and heralded an uneasy optimism. With new  
50 routines embedded, staff reflected on the consequences of the strain of the experience:  
51

52  
53  
54 *We're all pretty exhausted. And I've noticed - especially the past couple of*  
55 *months, I personally have been very, very short with patients. ... I don't indulge*  
56 *anyone at all anymore. I just say straight up this is how we work, you could*  
57  
58  
59  
60

1  
2  
3 *come, you could not come. That's it. I'm not going to spend 10 minutes on the*  
4  
5 *phone with you convincing you because I have so much work to do. (CBD R)*  
6  
7

## 8 **Understanding the change**

9

10  
11 Our data showed that the characteristics of and variations between the practices in the  
12 organization and delivery of clinical care were driven by the health policy environment,  
13 local ecology and each practice's core and adaptive reserve.<sup>10</sup>  
14  
15

### 16 **Health Policy Environment**

17

18  
19 While the Australian federal government provided no specific financial support to general practices  
20 during the pandemic, the impact was ameliorated by its 'JobKeeper' wage subsidy<sup>23</sup> and the  
21 introduction of MBS payments for telehealth. JobKeeper was only accessed by staff from one  
22 practice (CBD), but all made extensive use of telehealth. The federal government's Primary Health  
23 Networks<sup>24</sup> distributed some PPE as the months passed, although practices continued to need to  
24 source these privately. While practices were aware of, and often attentive to, a steady stream of  
25 government, Primary Health Networks and professional organization advice, shifting guidance with  
26 inadequate notice made it difficult to forge a consistent path.  
27  
28  
29  
30  
31  
32  
33  
34  
35  
36  
37  
38  
39

### 40 **Local Ecology**

41

42 The pandemic's impact varied across metropolitan Melbourne – neighbourhoods surrounding  
43 practices W and CHC had four times as many COVID-19 infections compared to the other practices.<sup>25</sup>  
44 Practice W's (federally funded) on-site COVID-19 testing clinic was established prior to the first local  
45 infection, and was viewed as critical in keeping the general practice environment 'safe'. The rising  
46 incidence of COVID-19 in public housing towers close to the CHC led to extensive outreach services.  
47 The extensive changes adopted by the other practices were unrelated to local infection rates,  
48 although the CBD practice created a COVID-19 testing clinic to meet the needs of its overseas worker  
49 clientele who were required to obtain COVID-19 tests prior to returning home.  
50  
51  
52  
53  
54  
55  
56  
57  
58  
59  
60

### ***Practice core***

The lack of formal external support or meaningful pandemic planning left the private practices internally focussed and needing to generate their own solutions to the pandemic challenges. The solutions and their uptake reflected the practices' organizational models and their leaders' internal models.

For example, the structure within SE2's corporate model (where early decision making was made by off-site regional managers) compounded local leaders' frustration and made it difficult for the practice to address the demands of the pandemic.

For all practices the introduction of MBS telehealth payments eased financial pressures that emerged with patients' increasing reluctance to seek face to face care. This required new routines to manage acute illness, plan prevention, and monitor CDM. Nevertheless, as the pandemic continued, financial pressures continued, with most practices reporting a 25-60% fall in income and adjustments to staffing to offset losses.

Government financial regulations generated some perverse incentives. During early pandemic phases, government funded telehealth consultations could not attract co-payments. As a result, several of the private practices began to encourage patients to attend the practice for face-to-face consultations, which still attracted private co-payments.

### ***Adaptive reserve***

Internal motivations were similar between practices. The early preoccupation was with a safe workplace focussed on structural changes, modifications to patient flow and an ongoing need for triage. As time passed, work was driven by desires to maintain both financial viability and quality clinical care. Most practice staff were increasingly concerned about their patient cohort's welfare, especially those with mental health conditions or complex chronic disease.

1  
2  
3 Leaders were key to adaptive reserve in the four privately owned practices and were critical to the  
4 maintenance of services in the CHC and the corporate practice. Within the CHC's complex external  
5 governance structure, management resources were rapidly redirected to the general practice, with  
6  
7 decision making mostly devolved to managers and staff members close to the general practice level.  
8  
9  
10  
11  
12 By contrast, at the four private practices, practice owners made most of the decisions, often with  
13  
14 minimal consultation with nurses, receptionists and contractor doctors:  
15  
16

17 *The practice principals have been taking a lot of unilateral decisions recently and there has*  
18 *not been a doctors' meeting for quite some time now. They even sent out an email asking for*  
19 *all the discussion to cease as they would be making the decisions from now on. I'm a bit*  
20 *worried it got everyone offside. (de-identified)*  
21  
22  
23  
24  
25  
26

27 Professional roles remained isolated and few leaders sought information from outside their own  
28 professional group. Pre-pandemic hierarchies between the owners and clinical and administrative  
29 staff were maintained and sometimes reinforced. Despite needing to "take on the lion's share of the  
30 infection control and cleaning and [having] very high risk interactions" (de-identified), nurses were  
31 rarely included in decision making.  
32  
33  
34  
35  
36  
37  
38

39 The data suggested occasional evolution of leadership approaches. The corporate practice (SE2)  
40 began with key decisions being made by the practice's regional management team. Practitioners and  
41 staff feelings of disempowerment improved when a local leadership team was formed comprising  
42 the practice manager, a senior nurse and a medical lead. However, several changes to routines (such  
43 as temperature testing all patients) were later overturned by regional leaders on cost grounds.  
44  
45  
46  
47  
48  
49

50 In the early months of the pandemic, contractor GPs in one practice felt the practice leadership was  
51 not "taking it seriously enough" (de-identified N). Following a formal presentation of the non-owner  
52 GPs' concerns to management, the practice transformed to become more collaborative, with weekly  
53 meetings and extensive use of social media for communication. However, nurses and administrative  
54 staff remained isolated from decision making:  
55  
56  
57  
58  
59  
60

1  
2  
3 A: No, the weekly meetings are not everyone. They're just the GPs. They do a Zoom meeting  
4  
5 now.

6  
7  
8 Q: But not with you?  
9

10 A: No, not with us. So that's what I'm saying, we just get things told to us in the corridor.

11  
12  
13 (de-identified participant N)  
14  
15

## 16 DISCUSSION

17  
18 Despite Melbourne's pandemic experience being the worst in Australia in 2020, practices were  
19 spared the staff deaths or multiple practice closures experienced overseas. The study practices  
20 mirrored international transformations of clinical, organizational and infection control routines. As  
21 elsewhere, PPE was difficult to access,<sup>26</sup> practice income fell<sup>27</sup> and practitioners worried about  
22 reduced face-to-face consultations<sup>28</sup> and the potential impact on patients with chronic health  
23 conditions.<sup>29</sup>

24  
25 Unanticipated crises, like a pandemic, can uncover the strengths, flexibility and fragility of  
26 organizations and the systems in which they are embedded.<sup>7</sup> The pandemic acted as a  
27 natural experiment of the effectiveness of models of care predominant in Australian general  
28 practice. We believe our data emphasises the fragility of the organizational models,  
29 financial security and support underpinning Australian primary care.  
30  
31

### 32 Models of care

33  
34 Our study data highlighted the potential of the CHC model to bridge the gap between primary care  
35 and public health.<sup>30</sup> Victoria's CHCs incorporate a focus on prevention, health equity and the social  
36 determinants of health.<sup>31</sup> The combination of the CHC's community focus and secure state funding  
37 helped it meet its mandate of addressing the evolving needs of local communities. By contrast, most  
38 of the private practices lacked the structural or organizational ability to go much beyond maintaining  
39 basic practice functions. They were isolated, internally preoccupied and, while provided with  
40  
41  
42  
43  
44  
45  
46  
47  
48  
49  
50  
51  
52  
53  
54  
55  
56  
57  
58  
59  
60

1  
2  
3 extensive information, generally left to negotiate the challenges of the pandemic alone. SE2's  
4  
5 remote governance and lack of internal management compounded workforce fragmentation and  
6  
7 demoralisation, and made it difficult for the practice to align with evolving demands. Practice W was  
8  
9 a partial exception, as its size, active leadership and community connection was reflected in the decision  
10  
11 to host a federally funded COVID-19 testing facility.  
12  
13

14  
15 The relative financial security of the CHC funding model and the explicit links with state health  
16  
17 services highlighted the potential of the CHC to address local needs of vulnerable communities.  
18  
19 Models similar to CHCs are widespread in North America and have been important in delivering  
20  
21 quality care to underserved populations.<sup>32</sup> Given the disproportionate impact of the pandemic on  
22  
23 vulnerable communities, and the importance of primary care to population health, future health  
24  
25 planning should explore the potential for either expanding the coverage of the CHC model or  
26  
27 exploring ways to incentivise the incorporation of CHC-like functions into private primary care  
28  
29 delivery.  
30  
31

### 32 33 **Financial security** 34

35  
36 As elsewhere,<sup>33-35</sup> all our participating practices were financially challenged by the pandemic. A  
37  
38 recent survey found that 65% of Australian GPs, particularly in urban and more affluent areas,  
39  
40 experienced reduced income in the early months of the pandemic.<sup>36</sup> Similar early financial impacts  
41  
42 were reported in many other nations,<sup>37 38 39</sup> with losses per FTE physician in the USA estimated as  
43  
44 over \$65,000 in 2020. Waitzberg observed that dramatically decreased income from patient visits  
45  
46 combined with minimal direct governmental control "reverses the conventional financial positions  
47  
48 of payers and providers and acts as a further hurdle to prioritizing public health".<sup>37</sup>  
49

50  
51  
52 Given the fee for service payment model for GPs in private businesses and the CHC, our participants  
53  
54 unsurprisingly had a preoccupation with financial security and modifying routines to maintain  
55  
56 income and avoid practice closures. This challenge could have been addressed by directed  
57  
58 government financial support.  
59  
60

1  
2  
3 Some degree of practice-directed financial support could be considered in future pandemics. Even  
4 relatively small capitated payments from payers (i.e. the federal government in Australia) could be  
5 used to mitigate losses and keep practices open.<sup>40</sup>  
6  
7  
8  
9

### 10 **Leading change at the practice level**

11  
12 It has been suggested that COVID-19 highlights the weak points in systems, but also provides an  
13 opportunity for transformation.<sup>41</sup> While practices in this study were all able to realign their  
14 organizational and clinical routines, transformation was constrained by hierarchical leadership  
15 structures, rigid financial models and pervasive professional boundaries.  
16  
17

18  
19 As others have found, our data identified isolated examples of increased collaboration,<sup>42</sup> and, at  
20 times (especially within the CHC) evidence of visionary, operational, and distributed leadership.<sup>43</sup>  
21 However, overall our data supported Gerada's contention that practices can both "crave" for  
22 authoritative leaders at times of distress, but also find such approaches to be disempowering.<sup>44</sup>  
23 Practice models and financing provided minimal incentives for leaders to be attentive to the local  
24 environment,<sup>16</sup> or open to creating links between organizations.<sup>45</sup>  
25  
26  
27  
28  
29  
30  
31  
32  
33  
34  
35

### 36 **Limitations**

37  
38 While data was collected from a range of organizational models, these were within a single  
39 Australian metropolitan area in the first year of a moderate COVID-19 pandemic. It is  
40 feasible that different routines would have emerged in practices in a different health policy  
41 or local environment context, such as rural practices, those not faced by a metropolitan  
42 area lockdown, and with no association with a University Department of General Practice.  
43  
44 While it was possible that key routines were not revealed, our external investigators,  
45 iterative approach and inclusion of international experts decreased this possibility.  
46  
47  
48  
49  
50  
51  
52  
53  
54  
55  
56  
57  
58  
59  
60



## Conclusion

Our study represented a natural experiment of the resilience, financial stability and governance within models of primary care in Australia. We found a fragile primary care sector that struggled to be fit for purpose in dealing with a pandemic. Practice isolation and financial strain were early and pervasive challenges to practice security. Leadership was critical, but many routine changes followed both financial and clinical priorities. Nevertheless, innovations in telehealth, triage and infection management are likely to be long lasting.

The Australian federal government's 10-year vision for improving primary care<sup>46</sup> highlights the importance of leadership at all levels and reconsideration of federal and state responsibilities in supporting general practices. Our findings point to the potential value of models such as the CHC for organizing and delivering care to highly vulnerable populations, and to the key role of practice leaders. The significant financial burdens experienced by several practices raises concerns as to the abilities of a purely fee for service system to both innovate and manage the critical primary care challenges of a global pandemic.

**Acknowledgments** We acknowledge the contributions of Sharon Clifford, Project Manager, who helped coordinate the study and John Furler, a clinician at one site.

**Contributors** GR led the project. GR, ES, JN, KA, TS-S and SH acted as participant investigators. BFC and WLM provided expert advice. JA and RL conducted and coded interviews and led data analysis. This paper was written by GR, JA, and RL with contributions from TS-S, JN, SH, BFC, WLM and KA. All authors contributed to study design and approved the final manuscript.

**Competing Interests** None declared.

**Funding** This research received no specific grant from any funding agency in the public, commercial or not-for-profit sectors.

1  
2  
3 **Data sharing** No additional data available.  
4  
5

6 **Ethics approval** Monash University Human Research Ethics Committee #2020-23950.  
7  
8  
9

## 10 **References**

- 11  
12 1. Hick JL, Biddinger PD. Novel Coronavirus and Old Lessons — Preparing the Health System  
13 for the Pandemic. *New England Journal of Medicine*. 2020/05/14 2020;382(20):e55.  
14  
15 doi:10.1056/NEJMp2005118  
16
- 17 2. Huston P, Campbell J, Russell G, et al. COVID-19 and primary care in six countries. *BJGP*  
18 *Open*. Sep 8 2020;doi:10.3399/bjgpopen20X101128  
19  
20
- 21 3. Braithwaite J, Tran Y, Ellis LA, Westbrook J. The 40 health systems, COVID-19 (40HS, C-19)  
22 study. *Int J Qual Health Care*. Feb 20 2021;33(1)doi:10.1093/intqhc/mzaa113  
23  
24
- 25 4. Boroujeni M, Saberian M, Li J. Environmental impacts of COVID-19 on Victoria, Australia,  
26 witnessed two waves of Coronavirus. *Environ Sci Pollut Res Int*. Mar 2021;28(11):14182-14191.  
27  
28 doi:10.1007/s11356-021-12556-y  
29
- 30 5. Erny-Albrecht K, Bywood P. *Corporatisation of general practice – impact and implications*.  
31 2016:1-53. *PHCRIS Policy Issue Review*.  
32  
33
- 34 6. McDonald J, Ward B, Lane R, et al. How are co-located primary health care centres  
35 integrating care for people with chronic conditions? *International Journal of Integrated Care*.  
36 2017;17(3)doi:10.5334/ijic.3163  
37  
38
- 39 7. Carmeli A, Schaubroeck J. Crisis-Preparedness: The Importance of Learning from Failures.  
40 *Long Range Planning*. 2008/04/01/ 2008;41(2):177-196. doi:<https://doi.org/10.1016/j.lrp.2008.01.001>  
41  
42
- 43 8. Plsek PE, Greenhalgh T. Complexity science: The challenge of complexity in health care.  
44 *BMJ*. 2001;323(7313):625-8.  
45  
46
- 47 9. Miller WL, Crabtree BF, McDaniel R, Stange KC. Understanding change in primary care  
48 practice using complexity theory. *J Fam Pract*. May 1998;46(5):369-76.  
49  
50
- 51 10. Yin R. *Case study research: Design and methods (3rd ed.)*. Sage; 2003.  
52  
53  
54  
55  
56  
57  
58  
59  
60

- 1  
2  
3 11. van Buul LW, Sikkens JJ, van Agtmael MA, Kramer MHH, van der Steen JT, Hertogh CMPM.  
4 Participatory action research in antimicrobial stewardship: a novel approach to improving antimicrobial  
5 prescribing in hospitals and long-term care facilities. *Journal of Antimicrobial Chemotherapy*.  
6  
7 2014;69(7):1734-1741. doi:10.1093/jac/dku068  
8  
9
- 10  
11 12. Russell G, Advocat J, Lane R, et al. How do general practices respond to a pandemic?  
12 Protocol for a prospective qualitative study of six Australian practices. *BMJ Open*. 01-Sep-2021  
13 2021;11(9):e046086. doi:10.1136/bmjopen-2020-046086  
14  
15
- 16  
17 13. Balasubramanian BA, Chase SM, Nutting PA, et al. Using Learning Teams for Reflective  
18 Adaptation (ULTRA): Insights From a Team-Based Change Management Strategy in Primary Care.  
19 *Ann Fam Med*. September 1, 2010 2010;8(5):425-432. doi:10.1370/afm.1159  
20  
21
- 22  
23 14. Lane R, Russell G, Bardoel EA, et al. When colocation is not enough: a case study of  
24 General Practitioner Super Clinics in Australia. *Aust J Prim Health*. Aug 17  
25 2016;doi:10.1071/PY16039  
26  
27
- 28  
29 15. *NVivo qualitative data analysis software. Version 12*. 2018.  
30  
31
- 32  
33 16. Miller WL, Crabtree BF, Nutting PA, Stange KC, Jackson CR. Primary Care Practice  
34 Development: A Relationship-Centered Approach. *The Annals of Family Medicine*. May 1, 2010  
35 2010;8(Suppl 1):S68-S79. doi:10.1370/afm.1089  
36  
37
- 38  
39 17. Glaser BG. The Constant Comparative Method of Qualitative Analysis. *Social Problems*.  
40 1965;12(4):436-445. doi:10.2307/798843  
41  
42
- 43  
44 18. Russell G, Advocat J, Geneau R, et al. Examining organizational change in primary care  
45 practices: experiences from using ethnographic methods. *Fam Pract*. Dec 1 2011;doi:cmr117 [pii]  
46  
47 10.1093/fampra/cmr117  
48  
49
- 50  
51 19. Strauss AL. *Basics of qualitative research : techniques and procedures for developing*  
52 *grounded theory*. 2nd ed. ed. Thousand Oaks : Sage Publications; 1998.  
53
- 54  
55 20. Miles MB, Huberman AM, Saldana J. *Qualitative data analysis : a methods sourcebook*. Third  
56 edition. ed. Thousand Oaks, California : SAGE Publications, Inc.; 2014.  
57  
58  
59  
60

- 1  
2  
3 21. Tong A, Sainsbury P, Craig J. Consolidated criteria for reporting qualitative research  
4 (COREQ): a 32-item checklist for interviews and focus groups. *Int J Qual Health Care*. Dec  
5 2007;19(6):349-57. doi:10.1093/intqhc/mzm042  
6  
7  
8  
9 22. Australian Broadcasting Commission. Melbourne placed under stage 4 coronavirus lockdown,  
10 stage 3 for rest of Victoria as state of disaster declared. ABC. Accessed 13/02/2022, Melbourne  
11 placed under stage 4 coronavirus lockdown, stage 3 for rest of Victoria as state of disaster declared  
12  
13  
14  
15 23. Australian Government: Treasury. JobKeeper Payment. Commonwealth of Australia.  
16 Accessed 13/02/2022, <https://treasury.gov.au/coronavirus/jobkeeper>  
17  
18  
19  
20 24. Australian Government: Department of Health. Primary Health Networks. Commonwealth of  
21 Australia. Accessed 12/02/2022, <https://www.health.gov.au/initiatives-and-programs/phn>  
22  
23  
24 25. Australian Broadcasting Commission. Postcode data on coronavirus cases reveals Victoria's  
25 COVID-19 hotspots. 12/02/2022, Postcode data on coronavirus cases reveals Victoria's COVID-19  
26 hotspots  
27  
28  
29  
30 26. Alsnes IV, Munkvik M, Flanders WD, Oyane N. How well did Norwegian general practice  
31 prepare to address the COVID-19 pandemic? *Fam Med Community Health*. Dec  
32 2020;8(4)doi:10.1136/fmch-2020-000512  
33  
34  
35  
36 27. Roehr B. Covid-19 is threatening the survival of US primary care. *BMJ*. Jun 22  
37 2020;369:m2333. doi:10.1136/bmj.m2333  
38  
39  
40  
41 28. Xu Z, Fan J, Ding J, et al. The Impact of COVID-19 on Primary Care General Practice  
42 Consultations in a Teaching Hospital in Shanghai, China. *Front Med (Lausanne)*. 2021;8:642496.  
43 doi:10.3389/fmed.2021.642496  
44  
45  
46  
47 29. Rawaf S, Allen LN, Stigler FL, et al. Lessons on the COVID-19 pandemic, for and by primary  
48 care professionals worldwide. *Eur J Gen Pract*. Dec 2020;26(1):129-133.  
49 doi:10.1080/13814788.2020.1820479  
50  
51  
52  
53 30. Russell GM. Is prevention unbalancing general practice? *Med J Aust*. Jul 18  
54 2005;183(2):104-5.  
55  
56  
57  
58 31. Powell Davies G, McDonald J, Jeon Y, Krastev Y, Christl B, Faruqi N. *A narrative synthesis of*  
59 *models of integrated primary care centres/polyclinics*. 2009.  
60

- 1  
2  
3 32. Nagel DA, Keeping-Burke L, Pyrke RJL, et al. Frameworks for evaluation of community health  
4 centers' services and outcomes: a scoping review protocol. *JBIS Database System Rev Implement*  
5 *Rep.* Apr 2019;17(4):451-460. doi:10.11124/JBISRIR-2017-003843  
6  
7  
8  
9 33. Wilson G, Currie O, Bidwell S, et al. Empty waiting rooms: the New Zealand general practice  
10 experience with telehealth during the COVID-19 pandemic. *N Z Med J.* Jul 9 2021;134(1538):89-101.  
11  
12  
13 34. Filippi MK, Callen E, Wade A, et al. COVID-19's Financial Impact on Primary Care Clinicians  
14 and Practices. *J Am Board Fam Med.* May-Jun 2021;34(3):489-497.  
15  
16  
17 doi:10.3122/jabfm.2021.03.200502  
18  
19  
20 35. Krist AH, DeVoe JE, Cheng A, Ehrlich T, Jones SM. Redesigning Primary Care to Address  
21 the COVID-19 Pandemic in the Midst of the Pandemic. *Ann Fam Med.* Jul 2020;18(4):349-354.  
22  
23  
24 doi:10.1370/afm.2557  
25  
26 36. Scott A. The impact of COVID-19 on GPs and non-GP specialists in private practice.  
27 Melbourne Institute of Applied Economic and Social Research; 2020. p. 1-20.  
28  
29  
30 37. Waitzberg R, Quentin W, Webb E, Glied S. The Structure and Financing of Health Care  
31 Systems Affected How Providers Coped With COVID-19. *The Milbank quarterly.* 2021;99(2):542-564.  
32  
33  
34 doi:10.1111/1468-0009.12530  
35  
36  
37 38. Kippen R, O'Sullivan B, Hickson H, Leach M, Wallace G. A national survey of COVID-19  
38 challenges, responses and effects in Australian general practice. *Aust J Gen Pract.* Nov  
39 2020;49(11):745-751. doi:10.31128/ajgp-06-20-5465  
40  
41  
42  
43 39. Roth C, Breckner A, Moellinger S, et al. Beliefs and practices among primary care physicians  
44 during the first wave of the COVID-19 pandemic in Baden-Wuerttemberg (Germany): an observational  
45 study. *BMC Fam Pract.* May 6 2021;22(1):86. doi:10.1186/s12875-021-01433-9  
46  
47  
48  
49 40. Basu S, Phillips RS, Phillips R, Peterson LE, Landon BE. Primary Care Practice Finances In  
50 The United States Amid The COVID-19 Pandemic. *Health Aff (Millwood).* Sep 2020;39(9):1605-1614.  
51  
52  
53 doi:10.1377/hlthaff.2020.00794  
54  
55  
56 41. Friedman TL. We Need Great Leadership Now, and Here's What It Looks Like. *New York*  
57 *Times.* April 21, 2020. [https://www.nytimes.com/2020/04/21/opinion/covid-dov-](https://www.nytimes.com/2020/04/21/opinion/covid-dov-seidman.html?referringSource=articleShare)  
58 [seidman.html?referringSource=articleShare](https://www.nytimes.com/2020/04/21/opinion/covid-dov-seidman.html?referringSource=articleShare)  
59  
60

- 1  
2  
3 42. Renaa T, Brekke M. Restructuring in a GP practice during the COVID-19 pandemic - a focus-  
4 group study. *Tidsskr Nor Laegeforen*. Feb 2 2021;141(2)Driftsomlegging ved et fastlegekontor under  
5 covid-19-pandemien - en fokusgruppestudie. doi:10.4045/tidsskr.20.0713  
6  
7  
8  
9 43. Donahue KE, Halladay JR, Wise A, et al. Facilitators of transforming primary care: a look  
10 under the hood at practice leadership. *Ann Fam Med*. May-Jun 2013;11 Suppl 1:S27-33.  
11 doi:10.1370/afm.1492  
12  
13  
14  
15 44. Gerada C. Reflections on leadership during the Covid pandemic. *Postgrad Med*. Sep  
16 2021;133(7):717-720. doi:10.1080/00325481.2021.1903218  
17  
18  
19  
20 45. Westfall JM, Liaw W, Griswold K, et al. Uniting Public Health and Primary Care for Healthy  
21 Communities in the COVID-19 Era and Beyond. x. *J Am Board Fam Med*.  
22 2021;34(Supplement):S203. doi:10.3122/jabfm.2021.S1.200458  
23  
24  
25  
26 46. Commonwealth of Australia (Department of Health). Consultation Draft - Future focused  
27 primary health care: Australia's Primary Health Care 10 Year Plan 2022-2032. Commonwealth of  
28 Australia. Accessed 12/02/2022,  
29  
30  
31

32 **Figure legend** Figure 1 COVID-19 in Victoria during 2020. Data Collection Timeline  
33  
34  
35  
36  
37  
38  
39  
40  
41  
42  
43  
44  
45  
46  
47  
48  
49  
50  
51  
52  
53  
54  
55  
56  
57  
58  
59  
60

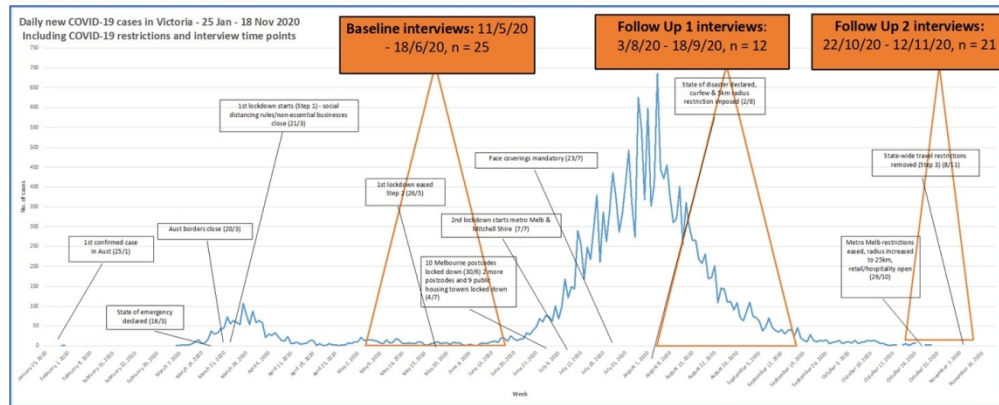

Figure 1 COVID-19 in Victoria during 2020. Data Collection Timeline

246x99mm (150 x 150 DPI)

## COREQ (COnsolidated criteria for REporting Qualitative research) Checklist

A checklist of items that should be included in reports of qualitative research. You must report the page number in your manuscript where you consider each of the items listed in this checklist. If you have not included this information, either revise your manuscript accordingly before submitting or note N/A.

| Topic                                          | Item No. | Guide Questions/Description                                                                                                                              | Reported on Page No. |
|------------------------------------------------|----------|----------------------------------------------------------------------------------------------------------------------------------------------------------|----------------------|
| <b>Domain 1: Research team and reflexivity</b> |          |                                                                                                                                                          |                      |
| <i>Personal characteristics</i>                |          |                                                                                                                                                          |                      |
| Interviewer/facilitator                        | 1        | Which author/s conducted the interview or focus group?                                                                                                   |                      |
| Credentials                                    | 2        | What were the researcher's credentials? E.g. PhD, MD                                                                                                     |                      |
| Occupation                                     | 3        | What was their occupation at the time of the study?                                                                                                      |                      |
| Gender                                         | 4        | Was the researcher male or female?                                                                                                                       |                      |
| Experience and training                        | 5        | What experience or training did the researcher have?                                                                                                     |                      |
| <i>Relationship with participants</i>          |          |                                                                                                                                                          |                      |
| Relationship established                       | 6        | Was a relationship established prior to study commencement?                                                                                              |                      |
| Participant knowledge of the interviewer       | 7        | What did the participants know about the researcher? e.g. personal goals, reasons for doing the research                                                 |                      |
| Interviewer characteristics                    | 8        | What characteristics were reported about the interviewer/facilitator? e.g. Bias, assumptions, reasons and interests in the research topic                |                      |
| <b>Domain 2: Study design</b>                  |          |                                                                                                                                                          |                      |
| <i>Theoretical framework</i>                   |          |                                                                                                                                                          |                      |
| Methodological orientation and Theory          | 9        | What methodological orientation was stated to underpin the study? e.g. grounded theory, discourse analysis, ethnography, phenomenology, content analysis |                      |
| <i>Participant selection</i>                   |          |                                                                                                                                                          |                      |
| Sampling                                       | 10       | How were participants selected? e.g. purposive, convenience, consecutive, snowball                                                                       |                      |
| Method of approach                             | 11       | How were participants approached? e.g. face-to-face, telephone, mail, email                                                                              |                      |
| Sample size                                    | 12       | How many participants were in the study?                                                                                                                 |                      |
| Non-participation                              | 13       | How many people refused to participate or dropped out? Reasons?                                                                                          |                      |
| <i>Setting</i>                                 |          |                                                                                                                                                          |                      |
| Setting of data collection                     | 14       | Where was the data collected? e.g. home, clinic, workplace                                                                                               |                      |
| Presence of non-participants                   | 15       | Was anyone else present besides the participants and researchers?                                                                                        |                      |
| Description of sample                          | 16       | What are the important characteristics of the sample? e.g. demographic data, date                                                                        |                      |
| <i>Data collection</i>                         |          |                                                                                                                                                          |                      |
| Interview guide                                | 17       | Were questions, prompts, guides provided by the authors? Was it pilot tested?                                                                            |                      |
| Repeat interviews                              | 18       | Were repeat interviews carried out? If yes, how many?                                                                                                    |                      |
| Audio/visual recording                         | 19       | Did the research use audio or visual recording to collect the data?                                                                                      |                      |
| Field notes                                    | 20       | Were field notes made during and/or after the interview or focus group?                                                                                  |                      |
| Duration                                       | 21       | What was the duration of the interviews or focus group?                                                                                                  |                      |
| Data saturation                                | 22       | Was data saturation discussed?                                                                                                                           |                      |
| Transcripts returned                           | 23       | Were transcripts returned to participants for comment and/or                                                                                             |                      |



| Topic                                  | Item No. | Guide Questions/Description                                                                                                        | Reported on Page No. |
|----------------------------------------|----------|------------------------------------------------------------------------------------------------------------------------------------|----------------------|
|                                        |          | correction?                                                                                                                        |                      |
| <b>Domain 3: analysis and findings</b> |          |                                                                                                                                    |                      |
| <i>Data analysis</i>                   |          |                                                                                                                                    |                      |
| Number of data coders                  | 24       | How many data coders coded the data?                                                                                               |                      |
| Description of the coding tree         | 25       | Did authors provide a description of the coding tree?                                                                              |                      |
| Derivation of themes                   | 26       | Were themes identified in advance or derived from the data?                                                                        |                      |
| Software                               | 27       | What software, if applicable, was used to manage the data?                                                                         |                      |
| Participant checking                   | 28       | Did participants provide feedback on the findings?                                                                                 |                      |
| <i>Reporting</i>                       |          |                                                                                                                                    |                      |
| Quotations presented                   | 29       | Were participant quotations presented to illustrate the themes/findings?<br>Was each quotation identified? e.g. participant number |                      |
| Data and findings consistent           | 30       | Was there consistency between the data presented and the findings?                                                                 |                      |
| Clarity of major themes                | 31       | Were major themes clearly presented in the findings?                                                                               |                      |
| Clarity of minor themes                | 32       | Is there a description of diverse cases or discussion of minor themes?                                                             |                      |

Developed from: Tong A, Sainsbury P, Craig J. Consolidated criteria for reporting qualitative research (COREQ): a 32-item checklist for interviews and focus groups. *International Journal for Quality in Health Care*. 2007. Volume 19, Number 6: pp. 349 – 357

**Once you have completed this checklist, please save a copy and upload it as part of your submission. DO NOT include this checklist as part of the main manuscript document. It must be uploaded as a separate file.**

# BMJ Open

## At the Edge of Chaos: A prospective multiple case study in Australian General Practices adapting to COVID-19

|                                 |                                                                                                                                                                                                                                                                                                                                                                                                                                                                                                                                                                                                                                                                                                                                                                                                                                                                                                                                                                                                                                                         |
|---------------------------------|---------------------------------------------------------------------------------------------------------------------------------------------------------------------------------------------------------------------------------------------------------------------------------------------------------------------------------------------------------------------------------------------------------------------------------------------------------------------------------------------------------------------------------------------------------------------------------------------------------------------------------------------------------------------------------------------------------------------------------------------------------------------------------------------------------------------------------------------------------------------------------------------------------------------------------------------------------------------------------------------------------------------------------------------------------|
| Journal:                        | <i>BMJ Open</i>                                                                                                                                                                                                                                                                                                                                                                                                                                                                                                                                                                                                                                                                                                                                                                                                                                                                                                                                                                                                                                         |
| Manuscript ID                   | bmjopen-2022-064266.R1                                                                                                                                                                                                                                                                                                                                                                                                                                                                                                                                                                                                                                                                                                                                                                                                                                                                                                                                                                                                                                  |
| Article Type:                   | Original research                                                                                                                                                                                                                                                                                                                                                                                                                                                                                                                                                                                                                                                                                                                                                                                                                                                                                                                                                                                                                                       |
| Date Submitted by the Author:   | 19-Sep-2022                                                                                                                                                                                                                                                                                                                                                                                                                                                                                                                                                                                                                                                                                                                                                                                                                                                                                                                                                                                                                                             |
| Complete List of Authors:       | Russell, Grant; Monash University Faculty of Medicine Nursing and Health Sciences, Department of General Practice<br>Lane, Riki; Monash University Faculty of Medicine Nursing and Health Sciences, Department of General Practice; Monash Health, Gender Clinic<br>Neil, Jennifer; Monash University Faculty of Medicine Nursing and Health Sciences, Department of General Practice<br>Advocat, Jenny; Monash University, Department of General Practice<br>Sturgiss, Elizabeth; Monash University, Department of General Practice<br>Staunton Smith, Timothy; Monash University Faculty of Medicine Nursing and Health Sciences, School of Primary Health Care<br>Alexander, Karyn; Monash University Faculty of Medicine Nursing and Health Sciences<br>Hattle, Simon; Monash University Faculty of Medicine Nursing and Health Sciences<br>Crabtree, Benjamin; Rutgers Robert Wood Johnson Medical School, Department of Family Medicine and Community Health, Research Division<br>Miller, William; Lehigh Valley Health Network, Family Medicine |
| <b>Primary Subject Heading</b>: | General practice / Family practice                                                                                                                                                                                                                                                                                                                                                                                                                                                                                                                                                                                                                                                                                                                                                                                                                                                                                                                                                                                                                      |
| Secondary Subject Heading:      | Qualitative research, Infectious diseases                                                                                                                                                                                                                                                                                                                                                                                                                                                                                                                                                                                                                                                                                                                                                                                                                                                                                                                                                                                                               |
| Keywords:                       | PRIMARY CARE, Health policy < HEALTH SERVICES ADMINISTRATION & MANAGEMENT, Change management < HEALTH SERVICES ADMINISTRATION & MANAGEMENT, VIROLOGY                                                                                                                                                                                                                                                                                                                                                                                                                                                                                                                                                                                                                                                                                                                                                                                                                                                                                                    |
|                                 |                                                                                                                                                                                                                                                                                                                                                                                                                                                                                                                                                                                                                                                                                                                                                                                                                                                                                                                                                                                                                                                         |

SCHOLARONE™  
Manuscripts

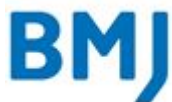

I, the Submitting Author has the right to grant and does grant on behalf of all authors of the Work (as defined in the below author licence), an exclusive licence and/or a non-exclusive licence for contributions from authors who are: i) UK Crown employees; ii) where BMJ has agreed a CC-BY licence shall apply, and/or iii) in accordance with the terms applicable for US Federal Government officers or employees acting as part of their official duties; on a worldwide, perpetual, irrevocable, royalty-free basis to BMJ Publishing Group Ltd ("BMJ") its licensees and where the relevant Journal is co-owned by BMJ to the co-owners of the Journal, to publish the Work in this journal and any other BMJ products and to exploit all rights, as set out in our [licence](#).

The Submitting Author accepts and understands that any supply made under these terms is made by BMJ to the Submitting Author unless you are acting as an employee on behalf of your employer or a postgraduate student of an affiliated institution which is paying any applicable article publishing charge ("APC") for Open Access articles. Where the Submitting Author wishes to make the Work available on an Open Access basis (and intends to pay the relevant APC), the terms of reuse of such Open Access shall be governed by a Creative Commons licence – details of these licences and which [Creative Commons](#) licence will apply to this Work are set out in our licence referred to above.

Other than as permitted in any relevant BMJ Author's Self Archiving Policies, I confirm this Work has not been accepted for publication elsewhere, is not being considered for publication elsewhere and does not duplicate material already published. I confirm all authors consent to publication of this Work and authorise the granting of this licence.

1  
2  
3 Title page  
4  
5

6 **At the Edge of Chaos: A prospective multiple case study in Australian General Practices**  
7  
8 **adapting to COVID-19**  
9  
10

11  
12  
13  
14  
15 Grant Russell<sup>1</sup> MBBS, PhD Professor of Primary Care Research  
16

17 Riki Lane<sup>1</sup> PhD Research Fellow  
18

19  
20 Jennifer Neil<sup>1</sup> MBBS(Hons) Clinical Educator  
21

22  
23 Jenny Advocat<sup>4</sup> PhD, Research Fellow  
24

25 Elizabeth Sturgiss<sup>4</sup>, MBBS, PhD Senior Research Fellow  
26

27  
28 Tim Staunton Smith MBBS Clinical Educator  
29

30 Karyn Alexander<sup>1</sup>, MBChB, PhD Clinical Educator  
31

32  
33 Simon Hattle<sup>1</sup>, MBBS (Hons) Clinical Educator  
34

35  
36 Benjamin F. Crabtree<sup>2</sup>, PhD Distinguished Professor  
37

38  
39 William L Miller<sup>3</sup>, MD Professor of Family Medicine  
40  
41  
42  
43

44 1 Department of General Practice, Monash University  
45

46 2 Department of Family Medicine and Community Health, Rutgers Robert Wood Johnson Medical School  
47

48  
49 3 Department of Family Medicine, Lehigh Valley Health Network  
50

51  
52 4 School of Primary and Allied Health Care, Monash University.  
53

54 **Corresponding author** Grant Russell. Building 1, 270 Ferntree Gully Rd, Notting Hill 3168, Victoria,  
55

56 Australia. Mobile: +61 400467310 Email: grant.russell@monash.edu  
57  
58  
59  
60

1  
2  
3  
4  
5  
6  
7  
8  
9  
10  
11  
12  
13  
14  
15  
16  
17  
18  
19  
20  
21  
22  
23  
24  
25  
26  
27  
28  
29  
30  
31  
32  
33  
34  
35  
36  
37  
38  
39  
40  
41  
42  
43  
44  
45  
46  
47  
48  
49  
50  
51  
52  
53  
54  
55  
56  
57  
58  
59  
60

**Word count** for the main text (excluding title page, abstract, strengths and limitations, abbreviations, tables, references, figure) 4435.

For peer review only

1  
2  
3 Abstract  
4  
5

6 **Objectives:** The rapid onset and progressive course of the COVID-19 pandemic challenged  
7  
8 primary care practices to generate rapid solutions to unique circumstances; creating a  
9  
10 natural experiment of effectiveness, resilience, financial stability and governance across  
11  
12 primary care models. We aimed to characterize how practices in Melbourne Australia  
13  
14 modified clinical and organizational routines in response to the pandemic in 2020-21 and  
15  
16 identify factors that influenced these changes.  
17  
18

19  
20 **Design:** Prospective, qualitative, participatory, case study design using constant  
21  
22 comparative data analysis, conducted between April 2020 and February 2021. Participant  
23  
24 general practitioner (GP) investigators were involved in study design, recruitment of other  
25  
26 participants, data collection and analysis. Data analysis included investigator diaries,  
27  
28 structured practice observation, documents and interviews.  
29  
30

31  
32 **Setting:** The cases were six Melbourne practices of varying size and organizational model.  
33  
34

35 **Participants:** GP investigators approached potential participants. Practice healthcare  
36  
37 workers were interviewed by social scientists on three occasions, and provided feedback on  
38  
39 presentations of preliminary findings.  
40  
41

42 **Results:** We conducted 58 interviews with 26 practice healthcare workers including  
43  
44 practice owners, practice managers, GPs, receptionists and nurses; and six interviews with  
45  
46 GP Investigators. Data saturation was achieved within each practice and across the sample.  
47  
48 The pandemic generated changes to triage, clinical care, infection control and  
49  
50 organizational routines, particularly around telehealth. While collaboration and trust  
51  
52 increased within several practices, others fragmented, leaving staff isolated and  
53  
54 demoralized. Financial and organizational stability, collaborative problem solving, creative  
55  
56 leadership, and communication (internally and within the broader healthcare sector) were  
57  
58 major influences on practices' ability to negotiate the pandemic.  
59  
60

1  
2  
3 **Conclusions:** This study demonstrates the complex influences on primary care practices,  
4  
5 and reinforces the strengths of clinician participation in research design, conduct and  
6  
7 analysis. Two implications are: telehealth, triage and infection management innovations  
8  
9 are likely to continue; the existing payments system provides inadequate support to  
10  
11 primary care in a global pandemic.  
12  
13

#### 14 15 Strengths and limitations of this study

- 16  
17  
18  
19 ► Our prospective case study design provided a detailed understanding of the evolution of clinical  
20  
21 and organisational routines within Australian general practices of varying models through the first  
22  
23 year of the COVID-19 pandemic.  
24  
25  
26 ► Our use of GPs as participant investigators overcame the challenges of recruiting and collecting  
27  
28 data from practices at a time when external researchers were unable to enter practices due to  
29  
30 public health restrictions.  
31  
32  
33 ► The credibility of our findings are increased by the multi-method data collection strategy  
34  
35 (providing a detailed, intensive exploration of individuals and organisations in context) and our  
36  
37 presentation of emergent findings to practice teams.  
38  
39  
40 ► Practices were all from Melbourne, the region in Australia that experienced both the highest  
41  
42 COVID case numbers and most prolonged and extensive lockdowns during 2020.  
43  
44  
45 ► Different practice routines may have emerged in other contexts, such as rural practices and those  
46  
47 with no association with a University Department of General Practice.  
48  
49  
50  
51  
52  
53  
54  
55  
56  
57  
58  
59  
60

Table 1: Abbreviations

|      |                                       |
|------|---------------------------------------|
| AOD  | Alcohol and other drug                |
| CALD | Culturally and linguistically diverse |
| CDM  | Chronic disease management            |
| CHC  | Community Health Centre               |
| FTE  | Full Time Equivalent                  |
| GP   | General Practitioner                  |
| CDM  | Chronic disease management            |
| MBS  | Medical Benefits Schedule             |
| N    | Nurse                                 |
| PPE  | Personal Protective Equipment         |
| PM   | Practice manager                      |
| PO   | Practice owner                        |
| R    | Reception staff                       |
| SES  | Socio-economic status                 |



## INTRODUCTION

The COVID-19 pandemic has challenged healthcare systems<sup>1</sup> and generated major changes in the delivery of primary care.<sup>2</sup> While Australia was spared high COVID-19 mortality during 2020,<sup>3</sup> two-thirds of 2020 COVID cases and nearly 90% of deaths were in the Melbourne metropolitan region (population 5.1 million), following a four-month outbreak. In response, between July and October 2020, the Victorian state government imposed one of the world's most stringent lockdowns.<sup>4</sup>

Both federal and state governments in Australia stressed the importance of primary care to the overall pandemic response. Australian primary care is largely delivered through a network of small, owner-operated general practices. Ten percent of practices are owned by large corporate entities,<sup>5</sup> and most states have a small number of comprehensive primary health care organizations, similar to Community Health Centres (CHCs) in other nations (see Table 1 for a list of all abbreviations).<sup>6</sup> Under Australia's federal government single-payer insurance scheme, the Medical Benefits Schedule (MBS), general practitioners (GPs) are paid a standard amount for each consultation, and can either accept that payment ("bulk-bill"), or charge an additional "co-payment" to the patient.

While complex systems such as primary care are generally robust,<sup>7</sup> situations of instability can generate an 'edge of chaos' state between "*equilibrium and complete disorder where systems have the potential to be most adaptive and creative*",<sup>8</sup> but where "*systems that do not successfully change can become extinct*".<sup>9</sup> The early phase of the pandemic generated such a scenario within Australian general practice.

There is limited research on the experiences of primary care practices providing care within the systemic strains caused by the pandemic. We asked: a) what changes to clinical and organizational routines were made during the first year of the pandemic; and b) what contextual, organizational and individual factors facilitated these changes? We anticipated

1  
2  
3 that addressing these questions would provide insights into the adaptivity and robustness  
4  
5 of the primary care system within Australia.  
6  
7

## 8 9 **METHODS**

10  
11 **Design:** We used a participatory, prospective qualitative case study<sup>10</sup> design, within which  
12  
13  
14 GP participant investigators shaped the project, and contributed to data collection and  
15  
16 analysis.<sup>11</sup> Design was informed by principles of participatory action research in which  
17  
18 processes of planning, action and reflection are conducted in close collaboration with  
19  
20 stakeholders and participants (here referring to both GP investigators and practice owners  
21  
22 and other staff).<sup>12</sup> Our methodology (including data collection tools, and approach to  
23  
24 analysis) has been detailed elsewhere,<sup>12</sup> and data collection is summarised below.  
25  
26  
27

28  
29 GP investigators comprised four clinician educators (JN, KA, SH and TSS) and two clinician  
30  
31 researchers (GR and ES), alongside two social science research fellows (JA and RL) with  
32  
33 PhDs and experience in qualitative research. Each investigator was affiliated with a single  
34  
35 University Department of General Practice. WM and BC acted as external advisors.  
36  
37

38  
39 **The practices constituted the cases being compared; they were the unit of analysis.**

40  
41 **Investigators were clinicians at these practices, and social scientists. Data sources**  
42  
43  
44 **were GP investigator observations, practice documents, interviews with practice**  
45  
46  
47 **clinicians and staff, responses to a presentation of interim findings to practices, and**  
48  
49 **reflective interviews with GP investigators.**  
50  
51  
52  
53

54  
55 **Setting and participants:** The study was set in six general practices of varying size and  
56  
57 organizational model in metropolitan Melbourne. Aligned with the participatory approach, practices  
58  
59 were chosen from locations where GP investigators based their clinical work. GR and EAS contacted  
60

1  
2  
3 potential participant investigators from GPs who were either current academic staff or recent PhD  
4 graduates of the Department of General Practice, prioritising those working within practices of  
5 varying size and organisational model.<sup>12</sup> Practice interview participants included GPs, nurses,  
6  
7  
8 practice managers and administrative staff. The GP investigators gained written informed consent  
9  
10  
11 from practice participants; the social scientists gained written consent from GP investigators for  
12  
13  
14 their reflective interviews. Data were collected between April 2020 and February 2021.  
15  
16

17 **Data collection:** The GP investigators used structured diaries to record their experiences. They  
18  
19  
20 completed a practice description tool;<sup>13, 14</sup> collated and photographed practice documents, signage  
21  
22  
23 and layout, and provided continuing input to data collection. RL and JA conducted semi-structured,  
24  
25  
26 in-depth, audio recorded telephone or videoconference interviews (30-60 minutes) with clinicians  
27  
28  
29 and administrative staff from each practice at three time points (see Figure 1). Subsequently, each  
30  
31  
32 GP investigator was interviewed once in early 2021, to reflect on data collected and their  
33  
34  
35 experiences. Interviews focused upon participants' individual experiences, perceived practice  
36  
37  
38 responses, and beliefs about factors influencing practice performance. Practice staff were invited to  
39  
40  
41 attend live video presentations by investigators of emerging findings at mid and end of project.  
42  
43  
44 Responses were collected and informed analysis.

45  
46  
47 **Data management:** All digital data was stored on a secure server only accessible by JA, RL and  
48  
49  
50 project manager SC. Interviews were professionally transcribed and all identifying information  
51  
52  
53 removed. Interview transcripts and observational data (diaries, practice documents and field notes)  
54  
55  
56 were coded by JA and RL using NVivo <sup>12, 15</sup> Our iterative coding template was based on concepts from  
57  
58  
59 Miller, et al's Relationship Centred Model of Primary Care Practice Development,<sup>16</sup> themes derived  
60  
61  
62 from initial reading and familiarisation with the raw data, and further emerging data themes.

1  
2  
3 **Data analysis:** Data analysis used a constant comparative approach<sup>17</sup> informed by prior  
4 approaches to investigation of primary care practice routines.<sup>14, 18</sup> JA and RL undertook data  
5 analysis, which was refined at regular meetings with GR and JN, and at a data retreat<sup>19</sup> with  
6 all investigators.  
7  
8  
9  
10

11  
12  
13 The use of matrices facilitated cross case comparisons.<sup>20</sup> An initial matrix organized summarized data  
14 under thematic codes (rows) versus practices (columns). Subsequently, further summarized matrices  
15 were used to generate narratives, which described the key elements of changes in each practice. As  
16 outlined in the protocol paper, intervention narratives and the matrices were further analysed  
17 through cross-case analysis to develop hypotheses to explain the implementation, uptake and  
18 sustainability of routine changes that followed the commencement of the pandemic.<sup>12</sup> Secondary  
19 analysis on the themes of leadership and staff burden has informed subsequent journal article  
20 submissions. Reporting followed Tong et al's consolidated criteria for reporting qualitative  
21 research.<sup>21</sup>  
22  
23  
24  
25  
26  
27  
28  
29  
30  
31  
32  
33

34 **Public and patient involvement statement:** Given limitations imposed by the pandemic on  
35 interaction with members of the community, this research was carried out without patient  
36 involvement.  
37  
38  
39  
40

## 41 **RESULTS**

42  
43 We recruited six of eight practices approached. One practice was part of a federal and state funded  
44 Community Health Centre, another was part of a large corporate network and the remainder were  
45 general practices of varying size, organizational structure, billing practices and patient  
46 characteristics. (See Table 2). All were organizationally and financially stable prior to the pandemic.  
47 We conducted 58 interviews with 26 practice staff including practice owners (PO), practice managers  
48 (PM), GPs, reception staff (R), and nurses (N) and six interviews with GP Investigators. Data  
49 saturation was achieved at the level of each practice and across the sample. The CHC-based  
50  
51  
52  
53  
54  
55  
56  
57  
58  
59  
60

1  
2  
3  
4  
5  
6  
7  
8  
9  
10  
11  
12  
13  
14  
15  
16  
17  
18  
19  
20  
21  
22  
23  
24  
25  
26  
27  
28  
29  
30  
31  
32  
33  
34  
35  
36  
37  
38  
39  
40  
41  
42  
43  
44  
45  
46  
47  
48  
49  
50  
51  
52  
53  
54  
55  
56  
57  
58  
59  
60

investigator left the practice in August 2020. Subsequently, another GP working at the practice provided liaison, but did not collect data.

For peer review only

Table 2. Participating practices

| PRACTICE PSEUDONYM | TYPE OF PRACTICE                                | LOCATION                  | BILLING SYSTEM <sup>1</sup> | PRACTICE POPULATION                                                     | GPS FTE IN PRACTICE | NURSES FTE IN PRACTICE | ALLIED HEALTH DISCIPLINES                                                                 |
|--------------------|-------------------------------------------------|---------------------------|-----------------------------|-------------------------------------------------------------------------|---------------------|------------------------|-------------------------------------------------------------------------------------------|
| <b>CHC</b>         | Community Health Centre                         | Inner city suburbs        | Bulk billing                | Lower SES <sup>2</sup> , CALD <sup>3</sup> , refugees, AOD <sup>4</sup> | 6 FTE <sup>5</sup>  | 5                      | Numerous health and social care disciplines                                               |
| <b>SE1</b>         | Private General Practice                        | South-eastern suburbs     | Blended                     | High SES, children and elderly                                          | 3.5 FTE             | 2                      | Dentist                                                                                   |
| <b>E</b>           | Private General Practice                        | Eastern suburbs           | Blended                     | High SES, very few CALD                                                 | 4-5 FTE             | 1 FTE (3 in total)     | Diabetes educator                                                                         |
| <b>CBD</b>         | Private General Practice                        | Central business district | Blended                     | Higher SES, Tourists, Multi-lingual GPs                                 | 3.5 FTE             | 1 FTE (2 in total)     | Clinical psychology                                                                       |
| <b>SE2</b>         | Private General Practice within large corporate | South-eastern suburbs     | Bulk billing                | Mid to low SES, broad patient mix                                       | 14 FTE              | 3.5FTE                 | Physiotherapy, dietetics                                                                  |
| <b>W</b>           | General Practice and Health Hub                 | Western suburbs           | Blended                     | Low SES, gentrifying                                                    | 15+ GPs             | 3.5 FTE                | Numerous co-located disciplines including psychology, dietetics, physiotherapy, podiatry. |

1 Bulk billing is where clinicians accept the Medicare benefit as full payment for the service. A blended system is where clinicians bulk bill some patients and require a co-payment from others.

2 SES: socio-economic status.

3 CALD: culturally and linguistically diverse patients.

4 AOD: alcohol and other drug patients

5 FTE: Full time equivalent

1  
2  
3  
4 Our team reflected on the time passage of the pandemic in its first year. We felt that the  
5  
6 data would be easier to understand if it were contextualised by stages. The names were  
7  
8 approved by consensus, and are intended to provide context through which to understand  
9  
10 the broad study findings.  
11

12  
13 Clinical and organizational routines evolved with the stages of the pandemic, patient  
14  
15 demand and changes to MBS telehealth payments. Pre-pandemic plans required for  
16  
17 practice accreditation prior to 2020 had minimal influence, and practices struggled with  
18  
19 conflicting advice from government and professional organizations at times. Stability of the  
20  
21 practice core, functional leadership, organizational model and communication were major  
22  
23 influences on the ability of practices to modify routines to complex and unpredictable  
24  
25 challenges. We begin by describing the evolution of the pandemic within the practices,  
26  
27 followed by an interpretation of the drivers of routine change seen through the lens of the  
28  
29 relationship centred model.  
30  
31  
32

### 33 ***Early chaos (February 2020 - April 2020)***

34  
35  
36 Practices began to be aware of the pandemic's implications in February 2020:  
37

38  
39 *We expected to be overwhelmed with very sick people and we were basing that*  
40  
41 *on what was happening in other countries... we had plans for home palliation,*  
42  
43 *staggered staff shifts in case one shift was infected and the Health Department*  
44  
45 *ordered everyone on that shift to disappear, so week on, week off. (CHC GP2)*  
46  
47  
48

49 The subsequent weeks were chaotic, as workplaces changed overnight:  
50

51  
52 *For two weeks at the very beginning, like early-mid March, it was absolute chaos.*  
53  
54 *Just in terms of the volume of patients that were calling non-stop. Mostly phone*  
55  
56 *calls, and mostly people really desperately wanting testing.... At first it was like*  
57  
58  
59  
60

1  
2  
3 *very overwhelming, but then it became a new norm to just, "This is the new thing.*  
4  
5 *Do it. Adapt, adapt, adapt." (CBD R)*  
6  
7

8 Many staff became increasingly frustrated by shortages of Personal Protective Equipment  
9 (PPE) and changing advice from government and professional bodies. They were concerned  
10 for their safety and that of their families and about the potential impact of rapid  
11 community transmission. The MBS broadened eligibility for telehealth consultations  
12 (previously limited to rural and remote areas), allowing some older GPs and other  
13 vulnerable staff to work from home, which increased the complexity of receptionists' work.  
14  
15  
16  
17  
18  
19  
20  
21

### 22 ***Emerging stability (May 2020 - June 2020)***

23  
24  
25 With cases falling, Victoria's community lockdown was lifted in late May. After the early  
26 disruption, the impact was less than feared:  
27  
28  
29

30 *The initial tension, anxiety, shock where people saw the horrendous news items*  
31 *from overseas: you could sense that in the doctors here, and the staff. ... so*  
32 *initially there was a run for shelter.. ... People feel as if things are well controlled*  
33 *and reasonably calm at the moment in terms of illness. (SE2 GP)*  
34  
35  
36  
37  
38  
39

40 All practices had incorporated fundamental changes to their work routines (see Table 3):  
41

42 i) *Keeping staff and patients safe.* Once problems sourcing PPE were partially resolved,  
43 practices began to prioritise creation of a COVID-19 safe workplace. Clinicians began  
44 wearing scrubs, room ventilation and cleaning was improved and physical barriers and  
45 isolation areas were introduced. These came with major changes in screening, triage and  
46 booking routines. Online appointment booking was paused or amended at all practices –  
47 reception staff screened all patients for COVID-19 infection risk by telephone, while  
48 informing them about requirements relating to safety, telehealth and billing. These  
49 infection control approaches varied between practices.  
50  
51  
52  
53  
54  
55  
56  
57  
58  
59  
60



1  
2  
3 *ii) Re-aligned clinical work.* Telehealth had major impacts on clinical care delivery.  
4

5 Telephone, rather than video, consultations predominated due to GP preferences and  
6  
7 some patient technological constraints. There was significant concern about patient  
8  
9 unwillingness to attend in person, and GPs often viewed telehealth as inadequate for  
10  
11 delivering quality care, especially for systematic chronic disease management (CDM).  
12  
13

14 *iii) Practice management.* To limit virus transmission risk, practice staff began  
15

16 communicating differently with each other. (See Table 4) Face to face meetings ceased,  
17  
18 replaced by emails, and in some practices, smart phone apps and virtual meetings. Formal  
19  
20 practice meetings were mostly held infrequently. Practice owners in the small private  
21  
22 practices made decisions to change routines, often unilaterally. GPs became increasingly  
23  
24 concerned about losing income due to reduced patient demand and an initial government  
25  
26 mandate to bulk bill all telehealth consultations.  
27  
28  
29  
30  
31  
32  
33  
34  
35  
36  
37  
38  
39  
40  
41  
42  
43  
44  
45  
46  
47  
48  
49  
50  
51  
52  
53  
54  
55  
56  
57  
58  
59  
60

Table 3. Modifications to workflow routines

| WORKFLOW ROUTINE                                            | DEFINITION                                                                            | DESCRIPTION OF CHANGES                                                                                                                                                                                                                                                                                                                                                                                                                                                                                                                                                                                                                                                                                                                                                                                                                                                                                                                                                                                                                                                                                |
|-------------------------------------------------------------|---------------------------------------------------------------------------------------|-------------------------------------------------------------------------------------------------------------------------------------------------------------------------------------------------------------------------------------------------------------------------------------------------------------------------------------------------------------------------------------------------------------------------------------------------------------------------------------------------------------------------------------------------------------------------------------------------------------------------------------------------------------------------------------------------------------------------------------------------------------------------------------------------------------------------------------------------------------------------------------------------------------------------------------------------------------------------------------------------------------------------------------------------------------------------------------------------------|
| <b>1 KEEPING STAFF AND PATIENTS SAFE</b>                    | Procedures to reduce infectious disease transmission                                  | <p>Increased PPE use; enhanced cleaning practices by external cleaners and practice staff.</p> <p>Patient waiting routines e.g. changed waiting room layout; wait in their car/outside until appointment times.</p> <p>Booking processes: All practices paused patient ability to make appointments online. Receptionists began to check respiratory symptoms and travel/contact history during patient booking for appointments by telephone and on arrival.</p> <p>Staff-to staff contact reduced greatly: such as closed lunch rooms, lunch to be eaten in rooms and in some practices the wearing of surgical scrubs. (<i>Impacts on routine 3</i>)</p>                                                                                                                                                                                                                                                                                                                                                                                                                                           |
| <b>2 RE-ALIGNED CLINICAL WORK</b>                           |                                                                                       |                                                                                                                                                                                                                                                                                                                                                                                                                                                                                                                                                                                                                                                                                                                                                                                                                                                                                                                                                                                                                                                                                                       |
| <b>2.1 TELEHEALTH</b>                                       | Procedures for conducting consultations via phone or video, rather than face to face. | <p>All practices began using telehealth for many consultations – enabled by changed MBS funding for telehealth (previously limited to rural and remote areas).</p> <p>All practices remained open for face to face consultations (usually with almost all GPs on site). Most GPs provided telehealth from the practice, but some worked from home when isolating or unwell or if they had personal risk factors such as advanced age or chronic disease:</p> <ul style="list-style-type: none"> <li>• Difficulties due to lack of required technology at home; providing access to patient data base, printing, faxing and billing.</li> <li>• At CHC all but two GPs worked from home; management provided home technology.</li> </ul> <p>GPs overwhelmingly used phone rather than video:</p> <ul style="list-style-type: none"> <li>• Reluctance to use video due to difficulties with logistics, practices' technology, and perceived ability for patients and/or GP to access and use technology.</li> </ul> <p>Receptionists needed to be aware of significantly modified billing schedule.</p> |
| <b>2.2 CASE MANAGEMENT CHRONIC ILLNESS/ CARE CONTINUITY</b> | Procedures for management of patients' ongoing health conditions                      | <p>All practices initially paused: Chronic Disease Management recalls; cervical cancer screening; 45-49 and 75+ year old health checks:</p> <ul style="list-style-type: none"> <li>• Major concerns about missed diagnosis with telehealth and patient reluctance to attend GP and/or hospital.</li> </ul> <p>Different approaches and timing for resuming chronic disease management follow ups – often financially driven in view of falling practice income:</p>                                                                                                                                                                                                                                                                                                                                                                                                                                                                                                                                                                                                                                   |

1  
2  
3  
4  
5  
6  
7  
8  
9  
10  
11  
12  
13  
14  
15  
16  
17  
18  
19  
20  
21  
22  
23  
24  
25  
26  
27  
28  
29  
30  
31  
32  
33  
34  
35  
36  
37  
38  
39  
40  
41  
42  
43  
44  
45  
46

|                               |                                                    |                                                                                                                                                                                                                                                                                                                                                                                                                                                                                                                                                                    |
|-------------------------------|----------------------------------------------------|--------------------------------------------------------------------------------------------------------------------------------------------------------------------------------------------------------------------------------------------------------------------------------------------------------------------------------------------------------------------------------------------------------------------------------------------------------------------------------------------------------------------------------------------------------------------|
|                               |                                                    | <ul style="list-style-type: none"> <li>Primarily conducted via phone or video with the assistance of the practice nurse.</li> </ul>                                                                                                                                                                                                                                                                                                                                                                                                                                |
| <b>3) PRACTICE MANAGEMENT</b> | Procedures for coordination between practice staff | <p>Staff meetings: Pre-existing large variation between practices in frequency and attendance:<br/> Shift to online meetings: excludes some, but includes others.<br/> Some practices increased meetings, others decreased them.</p> <p>Major loss in collegiality:<br/> Infection control obstructs social interaction and makes it more difficult to gain second opinions from practice colleagues.<br/> Especially where many staff work from home (as in the CHC)<br/> Online forums, meetings, phone calls assist, but exclude non-GPs in some practices.</p> |

peer review only

Table 4. Practice meetings and communication.

| Practice | Meeting routines                                                                                                  |                                                                                                                                                    |                                                                                                                  |                                                                    | Communication Tools                                                                                                                                                           |
|----------|-------------------------------------------------------------------------------------------------------------------|----------------------------------------------------------------------------------------------------------------------------------------------------|------------------------------------------------------------------------------------------------------------------|--------------------------------------------------------------------|-------------------------------------------------------------------------------------------------------------------------------------------------------------------------------|
|          | Pre COVID                                                                                                         | Early Chaos                                                                                                                                        | Emerging Stability                                                                                               | 2 <sup>nd</sup> Wave                                               |                                                                                                                                                                               |
| CHC      | Monthly / as required- all staff                                                                                  | Twice weekly                                                                                                                                       | Weekly Zoom (open to all staff, most attend, even on days off for some). Increased attendance from pre-pandemic. | As previous                                                        | Set up WhatsApp group at start of COVID-19 (for general staff communication)                                                                                                  |
| SE1      | GPs every 2 to 3 months, decided by owner.                                                                        | Weekly Zoom from May 2020. Generated by employed doctor advocacy.                                                                                  | Weekly Zoom – only GPs.                                                                                          | As previous                                                        | WhatsApp group for GPs at start of COVID-19                                                                                                                                   |
| E        | Every 1 or 2 months                                                                                               | Fortnightly by zoom; Nurses and receptionists not usually included                                                                                 | No change                                                                                                        | At peak of 2nd Wave, no meetings; leadership making all decisions. | Most communication by email                                                                                                                                                   |
| CBD      | Monthly                                                                                                           | Weekly, sometimes only GPs, sometimes Nurses. Also smaller informal meetings amongst GPs every morning                                             | Nurses stopped attending                                                                                         | As previous                                                        | WhatsApp group prior to COVID-19 but used more often during pandemic. WeChat group added.                                                                                     |
| SE2      | No all-staff meetings - off site managers only, no GP meetings, reception and nursing team have separate meetings | 1 GP meeting in March 2020, clinical investigator stepped up to clinical director, started regular meetings of PM, head nurse and medical director | No change                                                                                                        | No change                                                          | Medical director set up WhatsApp group for GPs in July to communicate changes to protocols, share thoughts, information - informal, not seen as good replacement for meetings |
| W        | Partners meet 1-2 times a month, GPs monthly lunch meeting, AGM                                                   | All staff weekly or fortnightly                                                                                                                    | No practice wide meetings since late March 2020                                                                  | As previous                                                        | Couple of WhatsApp groups, delegated nurse and doctor inactive during COVID-19                                                                                                |

### ***Negotiating a second wave (July 2020 – October 2020)***

In early July, rapidly increasing cases led to a strict four-month metropolitan Melbourne lockdown.<sup>22</sup> Despite case numbers reaching 700 per day, many participants across the practices felt their earlier changes had prepared them for the challenge. Clinicians became increasingly concerned about missed diagnoses and late presentations:

*[A patient has] really deteriorated in the last six weeks. ... I've had several telephone calls to persuade him to go into hospital, and eventually he did yesterday. I got him to agree to some blood tests... his liver has packed up. And he's jaundiced and I don't know if he will survive, but at least he's gone in. And if he hadn't have gone in, I would have said, "Oh no, what do I do now?" ... He would have died at home. (CHC GP1)*

Patients embraced telehealth, causing dilemmas for clinicians in maintaining quality care as a 'balance' between bringing patients to a potentially infectious location and dealing with the uncertainties of remote clinical care:

*We've put all sort of strict guidelines around what we think's suitable for telehealth and what's not. So, things like say mental health plans, basic administrative things like repeat scripts...referrals to other specialists... do that over the phone. But as soon as they start saying, "I've got abdominal pain," or, "I've got this thing on my arm, I'm not sure what it is," they've got to come in and have an appointment. (SE1 PO)*

Three practices began managing COVID-19 testing clinics:

*... we took over screening [from the Department of Health, because] They were taking up to two weeks to get a positive result to a patient. ... that was a significant increase in workload.... I pretty much worked seven days a week. I*

1  
2  
3 *think for three months I didn't have a day off, there were just lots of results*  
4 *coming through, notifications. The time taken to notify one positive result, to*  
5 *notify the Department of Health, could take one staff member two to three*  
6 *hours .... (CHC GP2)*  
7  
8  
9  
10  
11

12 As the lockdown continued, financial pressures from decreased practice income increased.  
13  
14 New staff vacancies were unfilled, and staff and clinicians were asked to take annual leave  
15 or reduce working hours. The privately owned practices sought to diversify income; training  
16 nurses in remote CDM, systematically calling patients for recall (most practices); or  
17 providing COVID-19 testing for asymptomatic travellers (CBD). The corporate's regional  
18 management modified CDM 'targets' to increase income. As cases rose, the CHC assumed  
19 responsibility for managing the pandemic response at nearby public housing towers, which  
20 required significant staffing resources and eventually attracted additional state  
21 government funding.  
22  
23  
24  
25  
26  
27  
28  
29  
30  
31  
32

### 33 ***Entering a new normal (November 2020 – February 2021)***

34

35  
36 Strict lockdown ended in late October 2020 and heralded an uneasy optimism. With new  
37 routines embedded, staff reflected on the consequences of the strain of the experience:  
38  
39

40  
41 *We're all pretty exhausted. And I've noticed - especially the past couple of*  
42 *months, I personally have been very, very short with patients. ... I don't indulge*  
43 *anyone at all anymore. I just say straight up this is how we work, you could*  
44 *come, you could not come. That's it. I'm not going to spend 10 minutes on the*  
45 *phone with you convincing you because I have so much work to do. (CBD R)*  
46  
47  
48  
49  
50  
51  
52  
53  
54  
55  
56  
57  
58  
59  
60

## Understanding the change

Our data showed that the characteristics of and variations between the practices in the organization and delivery of clinical care were driven by the health policy environment, local ecology and each practice's core and adaptive reserve.<sup>10</sup>

### ***Health Policy Environment***

While the Australian federal government provided no specific financial support to general practices during the pandemic, the impact was ameliorated by its 'JobKeeper' wage subsidy<sup>23</sup> and the introduction of MBS payments for telehealth. JobKeeper was only accessed by staff from one practice (CBD), but all made extensive use of telehealth. The federal government's Primary Health Networks<sup>24</sup> distributed some PPE as the months passed, although practices continued to need to source these privately. While practices were aware of, and often attentive to, a steady stream of government, Primary Health Networks and professional organization advice, shifting guidance with inadequate notice made it difficult to forge a consistent path.

### ***Local Ecology***

The pandemic's impact varied across metropolitan Melbourne – neighbourhoods surrounding practices W and CHC had four times as many COVID-19 infections compared to the other practices.<sup>25</sup> Practice W's (federally funded) on-site COVID-19 testing clinic was established prior to the first local infection, and was viewed as critical in keeping the general practice environment 'safe'. The rising incidence of COVID-19 in public housing towers close to the CHC led to extensive outreach services. The extensive changes adopted by the other practices were unrelated to local infection rates, although the CBD practice created a COVID-19 testing clinic to meet the needs of its overseas worker clientele who were required to obtain COVID-19 tests prior to returning home.

### ***Practice core***

The lack of formal external support or meaningful pandemic planning left the private practices internally focussed and needing to generate their own solutions to the pandemic challenges. The solutions and their uptake reflected the practices' organizational models and their leaders' internal models.

For example, the structure within SE2's corporate model (where early decision making was made by off-site regional managers) compounded local leaders' frustration and made it difficult for the practice to address the demands of the pandemic.

For all practices the introduction of MBS telehealth payments eased financial pressures that emerged with patients' increasing reluctance to seek face to face care. This required new routines to manage acute illness, plan prevention, and monitor CDM. Nevertheless, as the pandemic continued, financial pressures continued, with most practices reporting a 25-60% fall in income and adjustments to staffing to offset losses.

Government financial regulations generated some perverse incentives. During early pandemic phases, government funded telehealth consultations could not attract co-payments. As a result, several of the private practices began to encourage patients to attend the practice for face-to-face consultations, which still attracted private co-payments.

### ***Adaptive reserve***

Internal motivations were similar between practices. The early preoccupation was with a safe workplace focussed on structural changes, modifications to patient flow and an ongoing need for triage. As time passed, work was driven by desires to maintain both financial viability and quality clinical care. Most practice staff were increasingly concerned about their patient cohort's welfare, especially those with mental health conditions or complex chronic disease.



1  
2  
3 Leaders were key to adaptive reserve in the four privately owned practices and were critical to the  
4 maintenance of services in the CHC and the corporate practice. Within the CHC's complex external  
5 governance structure, management resources were rapidly redirected to the general practice, with  
6 decision making mostly devolved to managers and staff members close to the general practice level.  
7  
8 By contrast, at the four private practices, practice owners made most of the decisions, often with  
9 minimal consultation with nurses, receptionists and contractor doctors:  
10  
11  
12  
13  
14  
15  
16

17 *The practice principals have been taking a lot of unilateral decisions recently and there has*  
18 *not been a doctors' meeting for quite some time now. They even sent out an email asking for*  
19 *all the discussion to cease as they would be making the decisions from now on. I'm a bit*  
20 *worried it got everyone offside. (de-identified)*  
21  
22  
23  
24  
25  
26

27 Professional roles remained isolated and few leaders sought information from outside their own  
28 professional group. Pre-pandemic hierarchies between the owners and clinical and administrative  
29 staff were maintained and sometimes reinforced. Despite needing to "take on the lion's share of the  
30 infection control and cleaning and [having] very high risk interactions" (de-identified), nurses were  
31 rarely included in decision making.  
32  
33  
34  
35  
36  
37  
38

39 The data suggested occasional evolution of leadership approaches. The corporate practice (SE2)  
40 began with key decisions being made by the practice's regional management team. Practitioners and  
41 staff feelings of disempowerment improved when a local leadership team was formed comprising  
42 the practice manager, a senior nurse and a medical lead. However, several changes to routines (such  
43 as temperature testing all patients) were later overturned by regional leaders on cost grounds.  
44  
45  
46  
47  
48  
49

50 In the early months of the pandemic, contractor GPs in one practice felt the practice leadership was  
51 not "taking it seriously enough" (de-identified N). Following a formal presentation of the non-owner  
52 GPs' concerns to management, the practice transformed to become more collaborative, with weekly  
53 meetings and extensive use of social media for communication. However, nurses and administrative  
54 staff remained isolated from decision making:  
55  
56  
57  
58  
59  
60

1  
2  
3 A: No, the weekly meetings are not everyone. They're just the GPs. They do a Zoom meeting  
4  
5 now.

6  
7  
8 Q: But not with you?  
9

10 A: No, not with us. So that's what I'm saying, we just get things told to us in the corridor.

11  
12  
13 (de-identified participant N)  
14  
15

## 16 DISCUSSION

17  
18 Despite Melbourne's pandemic experience being the worst in Australia in 2020, practices were  
19 spared the staff deaths or multiple practice closures experienced overseas. The study practices  
20 mirrored international transformations of clinical, organizational and infection control routines. As  
21 elsewhere, PPE was difficult to access,<sup>26</sup> practice income fell<sup>27</sup> and practitioners worried about  
22 reduced face-to-face consultation<sup>28</sup> and the potential impact on patients with chronic health  
23 conditions.<sup>29</sup>

24  
25 Unanticipated crises, like a pandemic, can uncover the strengths, flexibility and fragility of  
26 organizations and the systems in which they are embedded.<sup>7</sup> The pandemic acted as a  
27 natural experiment of the effectiveness of models of care predominant in Australian  
28 general practice. We believe our data emphasises the fragility of the organizational models,  
29 financial security and support underpinning Australian primary care.  
30  
31

### 32 Models of care

33  
34 Our study data highlighted the potential of the CHC model to bridge the gap between primary care  
35 and public health.<sup>30</sup> Victoria's CHCs incorporate a focus on prevention, health equity and the social  
36 determinants of health.<sup>31</sup> The combination of the CHC's community focus and secure state funding  
37 helped it meet its mandate of addressing the evolving needs of local communities. By contrast, most  
38 of the private practices lacked the structural or organizational ability to go much beyond maintaining  
39 basic practice functions. They were isolated, internally preoccupied and, while provided with  
40  
41  
42  
43  
44  
45  
46  
47  
48  
49  
50  
51  
52  
53  
54  
55  
56  
57  
58  
59  
60

1  
2  
3 extensive information, generally left to negotiate the challenges of the pandemic alone. SE2's  
4  
5 remote governance and lack of internal management compounded workforce fragmentation and  
6  
7 demoralisation, and made it difficult for the practice to align with evolving demands. Practice W was  
8  
9 a partial exception, as its size, active leadership and community connection was reflected in the  
10  
11 decision to host a federally funded COVID-19 testing facility.  
12  
13

14  
15 The relative financial security of the CHC funding model and the explicit links with state health  
16  
17 services highlighted the potential of the CHC to address local needs of vulnerable communities.  
18  
19 Models similar to CHCs are widespread in North America and have been important in delivering  
20  
21 quality care to underserved populations.<sup>32</sup> Given the disproportionate impact of the pandemic on  
22  
23 vulnerable communities, and the importance of primary care to population health, future health  
24  
25 planning should explore the potential for either expanding the coverage of the CHC model or  
26  
27 exploring ways to incentivise the incorporation of CHC-like functions into private primary care  
28  
29 delivery.  
30  
31  
32

### 33 **Financial security**

34  
35  
36 As elsewhere,<sup>33-35</sup> all our participating practices were financially challenged by the pandemic. A  
37  
38 recent survey found that 65% of Australian GPs, particularly in urban and more affluent areas,  
39  
40 experienced reduced income in the early months of the pandemic.<sup>36</sup> Similar early financial impacts  
41  
42 were reported in many other nations,<sup>37 38 39</sup> with losses per FTE physician in the USA estimated as  
43  
44 over \$65,000 in 2020. Waitzberg observed that dramatically decreased income from patient visits  
45  
46 combined with minimal direct governmental control “reverses the conventional financial positions  
47  
48 of payers and providers and acts as a further hurdle to prioritizing public health”.<sup>37</sup>  
49  
50  
51

52  
53 Given the fee for service payment model for GPs in private businesses and the CHC, our participants  
54  
55 unsurprisingly had a preoccupation with financial security and modifying routines to maintain  
56  
57 income and avoid practice closures. This challenge could have been addressed by directed  
58  
59 government financial support.  
60

1  
2  
3 Some degree of practice-directed financial support could be considered in future pandemics. Even  
4 relatively small capitated payments from payers (i.e. the federal government in Australia) could be  
5 used to mitigate losses and keep practices open.<sup>40</sup>  
6  
7  
8  
9

### 10 **Leading change at the practice level**

11  
12 It has been suggested that COVID-19 highlights the weak points in systems, but also provides an  
13 opportunity for transformation.<sup>41</sup> While practices in this study were all able to realign their  
14 organizational and clinical routines, transformation was constrained by hierarchical leadership  
15 structures, rigid financial models and pervasive professional boundaries.  
16  
17

18  
19 As others have found, our data identified isolated examples of increased collaboration,<sup>42</sup> and, at  
20 times (especially within the CHC) evidence of visionary, operational, and distributed leadership.<sup>43</sup>  
21 However, overall our data supported Gerada's contention that practices can both "crave" for  
22 authoritative leaders at times of distress, but also find such approaches to be disempowering.<sup>44</sup>  
23 Practice models and financing provided minimal incentives for leaders to be attentive to the local  
24 environment,<sup>16</sup> or open to creating links between organizations.<sup>45</sup>  
25  
26  
27  
28  
29  
30  
31  
32  
33  
34  
35

### 36 **Limitations**

37  
38 While data was collected from a range of organizational models, these were within a single  
39 Australian metropolitan area in the first year of a moderate COVID-19 pandemic. It is  
40 feasible that different routines would have emerged in practices in a different health policy  
41 or local environment context, such as rural practices, those not faced by a metropolitan  
42 area lockdown, and with no association with a University Department of General Practice.  
43  
44  
45  
46  
47  
48  
49

50 While it was possible that key routines were not revealed, our external investigators,  
51 iterative approach and inclusion of international experts decreased this possibility.  
52  
53  
54  
55

56 The GP investigators were involved in recruitment and data collection in their practice, and were  
57 closely involved in data analysis. Their views are inevitably influenced by their personal experiences  
58  
59  
60

1  
2  
3 of practice dynamics. This adds important insights into practice functioning, but also has the  
4  
5 potential to override the views of other practice participants. This possibility is countervailed by two  
6  
7 key factors. 1) The vast majority of data analysis, including all coding of data, was undertaken by the  
8  
9 social scientists. 2) Feedback sessions by practice staff on interim data provided member-checking of  
10  
11 data validity.  
12  
13  
14

## 15 **Conclusion**

16  
17  
18 Our study represented a natural experiment of the resilience, financial stability and governance  
19  
20 within models of primary care in Australia. We found a fragile primary care sector that struggled to  
21  
22 be fit for purpose in dealing with a pandemic. Practice isolation and financial strain were early and  
23  
24 pervasive challenges to practice security. Leadership was critical, but many routine changes followed  
25  
26 both financial and clinical priorities. Nevertheless, innovations in telehealth, triage and infection  
27  
28 management are likely to be long lasting.  
29  
30  
31

32  
33 The Australian federal government's 10-year vision for improving primary care<sup>46</sup> highlights the  
34  
35 importance of leadership at all levels and reconsideration of federal and state responsibilities in  
36  
37 supporting general practices. Our findings point to the potential value of models such as the CHC for  
38  
39 organizing and delivering care to highly vulnerable populations, and to the key role of practice  
40  
41 leaders. The significant financial burdens experienced by several practices raises concerns as to the  
42  
43 abilities of a purely fee for service system to both innovate and manage the critical primary care  
44  
45 challenges of a global pandemic.  
46  
47  
48

49  
50 **Acknowledgments** We acknowledge the contributions of Sharon Clifford, Project Manager, who  
51  
52 helped coordinate the study and John Furler, a clinician at one site.  
53  
54

55  
56 **Contributors** GR led the project. GR, ES, JN, KA, TS-S and SH acted as participant investigators. BFC  
57  
58 and WLM provided expert advice. JA and RL conducted and coded interviews and led data analysis.  
59  
60

This paper was written by GR, JA, and RL with contributions from TS-S, ES, JN, SH, BFC, WLM and KA.

All authors contributed to study design and approved the final manuscript.

Competing Interests None declared.

**Funding** This research received no specific grant from any funding agency in the public, commercial or not-for-profit sectors.

**Data sharing** No additional data available.

**Ethics approval** Monash University Human Research Ethics Committee #2020-23950.

## References

1. Hick JL, Biddinger PD. Novel Coronavirus and Old Lessons — Preparing the Health System for the Pandemic. *New England Journal of Medicine*. 2020/05/14 2020;382(20):e55.  
doi:10.1056/NEJMp2005118
2. Huston P, Campbell J, Russell G, et al. COVID-19 and primary care in six countries. *BJGP Open*. Sep 8 2020;doi:10.3399/bjgpopen20X101128
3. Braithwaite J, Tran Y, Ellis LA, Westbrook J. The 40 health systems, COVID-19 (40HS, C-19) study. *Int J Qual Health Care*. Feb 20 2021;33(1)doi:10.1093/intqhc/mzaa113
4. Boroujeni M, Saberian M, Li J. Environmental impacts of COVID-19 on Victoria, Australia, witnessed two waves of Coronavirus. *Environ Sci Pollut Res Int*. Mar 2021;28(11):14182-14191.  
doi:10.1007/s11356-021-12556-y
5. Erny-Albrecht K, Bywood P. *Corporatisation of general practice – impact and implications*. 2016:1-53. *PHCRIS Policy Issue Review*.
6. McDonald J, Ward B, Lane R, et al. How are co-located primary health care centres integrating care for people with chronic conditions? *International Journal of Integrated Care*. 2017;17(3)doi:10.5334/ijic.3163

- 1  
2  
3 7. Carmeli A, Schaubroeck J. Crisis-Preparedness: The Importance of Learning from Failures.  
4  
5 *Long Range Planning*. 2008/04/01/ 2008;41(2):177-196. doi:<https://doi.org/10.1016/j.lrp.2008.01.001>  
6
- 7 8. Plsek PE, Greenhalgh T. Complexity science: The challenge of complexity in health care.  
8  
9 *BMJ*. 2001;323(7313):625-8.  
10
- 11 9. Miller WL, Crabtree BF, McDaniel R, Stange KC. Understanding change in primary care  
12 practice using complexity theory. *J Fam Pract*. May 1998;46(5):369-76.  
13
- 14 10. Yin R. *Case study research: Design and methods (3rd ed.)*. Sage; 2003.  
15
- 16 11. van Buul LW, Sikkens JJ, van Agtmael MA, Kramer MHH, van der Steen JT, Hertogh CMPM.  
17 Participatory action research in antimicrobial stewardship: a novel approach to improving antimicrobial  
18 prescribing in hospitals and long-term care facilities. *Journal of Antimicrobial Chemotherapy*.  
19 2014;69(7):1734-1741. doi:10.1093/jac/dku068  
20  
21  
22  
23  
24  
25  
26  
27 12. Russell G, Advocat J, Lane R, et al. How do general practices respond to a pandemic?  
28 Protocol for a prospective qualitative study of six Australian practices. *BMJ Open*. 01-Sep-2021  
29 2021;11(9):e046086. doi:10.1136/bmjopen-2020-046086  
30  
31  
32
- 33 13. Balasubramanian BA, Chase SM, Nutting PA, et al. Using Learning Teams for Reflective  
34 Adaptation (ULTRA): Insights From a Team-Based Change Management Strategy in Primary Care.  
35 *Ann Fam Med*. September 1, 2010 2010;8(5):425-432. doi:10.1370/afm.1159  
36  
37  
38
- 39 14. Lane R, Russell G, Bardoel EA, et al. When colocation is not enough: a case study of  
40 General Practitioner Super Clinics in Australia. *Aust J Prim Health*. Aug 17  
41 2016;doi:10.1071/PY16039  
42  
43  
44
- 45 15. *NVivo qualitative data analysis software. Version 12*. 2018.  
46  
47
- 48 16. Miller WL, Crabtree BF, Nutting PA, Stange KC, Javón CR. Primary Care Practice  
49 Development: A Relationship-Centered Approach. *The Annals of Family Medicine*. May 1, 2010  
50 2010;8(Suppl 1):S68-S79. doi:10.1370/afm.1089  
51  
52  
53
- 54 17. Glaser BG. The Constant Comparative Method of Qualitative Analysis. *Social Problems*.  
55 1965;12(4):436-445. doi:10.2307/798843  
56  
57  
58  
59  
60

- 1  
2  
3 18. Russell G, Advocat J, Geneau R, et al. Examining organizational change in primary care  
4 practices: experiences from using ethnographic methods. *Fam Pract*. Dec 1 2011;doi:cmr117 [pii]  
5  
6 10.1093/fampra/cmr117  
7  
8  
9  
10 19. Strauss AL. *Basics of qualitative research : techniques and procedures for developing*  
11 *grounded theory*. 2nd ed. ed. Thousand Oaks : Sage Publications; 1998.  
12  
13  
14 20. Miles MB, Huberman AM, Saldana J. *Qualitative data analysis : a methods sourcebook*. Third  
15 edition. ed. Thousand Oaks, California : SAGE Publications, Inc.; 2014.  
16  
17  
18 21. Tong A, Sainsbury P, Craig J. Consolidated criteria for reporting qualitative research  
19 (COREQ): a 32-item checklist for interviews and focus groups. *Int J Qual Health Care*. Dec  
20 2007;19(6):349-57. doi:10.1093/intqhc/mzm042  
21  
22  
23  
24 22. Australian Broadcasting Commission. Melbourne placed under stage 4 coronavirus lockdown,  
25 stage 3 for rest of Victoria as state of disaster declared. ABC. Accessed 13/02/2022, Melbourne  
26 placed under stage 4 coronavirus lockdown, stage 3 for rest of Victoria as state of disaster declared  
27  
28  
29  
30 23. Australian Government: Treasury. JobKeeper Payment. Commonwealth of Australia.  
31 Accessed 13/02/2022, <https://treasury.gov.au/coronavirus/jobkeeper>  
32  
33  
34 24. Australian Government: Department of Health. Primary Health Networks. Commonwealth of  
35 Australia. Accessed 12/02/2022, <https://www.health.gov.au/initiatives-and-programs/phn>  
36  
37  
38 25. Australian Broadcasting Commission. Postcode data on coronavirus cases reveals Victoria's  
39 COVID-19 hotspots. 12/02/2022, Postcode data on coronavirus cases reveals Victoria's COVID-19  
40 hotspots  
41  
42  
43  
44  
45 26. Alsnes IV, Munkvik M, Flanders WD, Oyane N. How well did Norwegian general practice  
46 prepare to address the COVID-19 pandemic? *Fam Med Community Health*. Dec  
47 2020;8(4)doi:10.1136/fmch-2020-000512  
48  
49  
50  
51 27. Roehr B. Covid-19 is threatening the survival of US primary care. *BMJ*. Jun 22  
52 2020;369:m2333. doi:10.1136/bmj.m2333  
53  
54  
55  
56  
57  
58  
59  
60



- 1  
2  
3 28. Xu Z, Fan J, Ding J, et al. The Impact of COVID-19 on Primary Care General Practice  
4 Consultations in a Teaching Hospital in Shanghai, China. *Front Med (Lausanne)*. 2021;8:642496.  
5  
6 doi:10.3389/fmed.2021.642496  
7  
8  
9 29. Rawaf S, Allen LN, Stigler FL, et al. Lessons on the COVID-19 pandemic, for and by primary  
10 care professionals worldwide. *Eur J Gen Pract*. Dec 2020;26(1):129-133.  
11  
12 doi:10.1080/13814788.2020.1820479  
13  
14  
15 30. Russell GM. Is prevention unbalancing general practice? *Med J Aust*. Jul 18  
16 2005;183(2):104-5.  
17  
18  
19 31. Powell Davies G, McDonald J, Jeon Y, Krastev Y, Christl B, Faruqi N. *A narrative synthesis of*  
20 *models of integrated primary care centres/polyclinics*. 2009.  
21  
22  
23 32. Nagel DA, Keeping-Burke L, Pyrke RJL, et al. Frameworks for evaluation of community health  
24 centers' services and outcomes: a scoping review protocol. *JBI Database System Rev Implement*  
25 *Rep*. Apr 2019;17(4):451-460. doi:10.11124/JBISRIR-2017-003843  
26  
27  
28 33. Wilson G, Currie O, Bidwell S, et al. Empty waiting rooms: the New Zealand general practice  
29 experience with telehealth during the COVID-19 pandemic. *N Z Med J*. Jul 9 2021;134(1538):89-101.  
30  
31  
32 34. Filippi MK, Callen E, Wade A, et al. COVID-19's Financial Impact on Primary Care Clinicians  
33 and Practices. *J Am Board Fam Med*. May-Jun 2021;34(3):489-497.  
34  
35  
36 doi:10.3122/jabfm.2021.03.200502  
37  
38  
39 35. Krist AH, DeVoe JE, Cheng A, Ehrlich T, Jones SM. Redesigning Primary Care to Address  
40 the COVID-19 Pandemic in the Midst of the Pandemic. *Ann Fam Med*. Jul 2020;18(4):349-354.  
41  
42  
43 doi:10.1370/afm.2557  
44  
45  
46 36. Scott A. The impact of COVID-19 on GPs and non-GP specialists in private practice.  
47 Melbourne Institute of Applied Economic and Social Research; 2020. p. 1-20.  
48  
49  
50 37. Waitzberg R, Quentin W, Webb E, Glied S. The Structure and Financing of Health Care  
51 Systems Affected How Providers Coped With COVID-19. *The Milbank quarterly*. 2021;99(2):542-564.  
52  
53  
54 doi:10.1111/1468-0009.12530  
55  
56  
57  
58  
59  
60

- 1  
2  
3 38. Kippen R, O'Sullivan B, Hickson H, Leach M, Wallace G. A national survey of COVID-19  
4 challenges, responses and effects in Australian general practice. *Aust J Gen Pract*. Nov  
5 2020;49(11):745-751. doi:10.31128/ajgp-06-20-5465  
6  
7  
8  
9 39. Roth C, Breckner A, Moellinger S, et al. Beliefs and practices among primary care physicians  
10 during the first wave of the COVID-19 pandemic in Baden-Wuerttemberg (Germany): an observational  
11 study. *BMC Fam Pract*. May 6 2021;22(1):86. doi:10.1186/s12875-021-01433-9  
12  
13  
14  
15 40. Basu S, Phillips RS, Phillips R, Peterson LE, Landon BE. Primary Care Practice Finances In  
16 The United States Amid The COVID-19 Pandemic. *Health Aff (Millwood)*. Sep 2020;39(9):1605-1614.  
17 doi:10.1377/hlthaff.2020.00794  
18  
19  
20  
21  
22 41. Friedman TL. We Need Great Leadership Now, and Here's What It Looks Like. *New York*  
23 *Times*. April 21, 2020. [https://www.nytimes.com/2020/04/21/opinion/covid-dov-](https://www.nytimes.com/2020/04/21/opinion/covid-dov-seidman.html?referringSource=articleShare)  
24 [seidman.html?referringSource=articleShare](https://www.nytimes.com/2020/04/21/opinion/covid-dov-seidman.html?referringSource=articleShare)  
25  
26  
27  
28 42. Renaa T, Brekke M. Restructuring in a GP practice during the COVID-19 pandemic - a focus-  
29 group study. *Tidsskr Nor Laegeforen*. Feb 2 2021;141(2)Driftsomlegging ved et fastlegekontor under  
30 covid-19-pandemien - en fokusgruppestudie. doi:10.4045/tidsskr.20.0713  
31  
32  
33  
34 43. Donahue KE, Halladay JR, Wise A, et al. Facilitators of transforming primary care: a look  
35 under the hood at practice leadership. *Ann Fam Med*. May-Jun 2013;11 Suppl 1:S27-33.  
36 doi:10.1370/afm.1492  
37  
38  
39  
40 44. Gerada C. Reflections on leadership during the Covid pandemic. *Postgrad Med*. Sep  
41 2021;133(7):717-720. doi:10.1080/00325481.2021.1903218  
42  
43  
44  
45 45. Westfall JM, Liaw W, Griswold K, et al. Uniting Public Health and Primary Care for Healthy  
46 Communities in the COVID-19 Era and Beyond. x. *J Am Board Fam Med*.  
47 2021;34(Supplement):S203. doi:10.3122/jabfm.2021.S1.200458  
48  
49  
50  
51 46. Commonwealth of Australia (Department of Health). Consultation Draft - Future focused  
52 primary health care: Australia's Primary Health Care 10 Year Plan 2022-2032. Commonwealth of  
53 Australia. Accessed 12/02/2022,  
54  
55  
56  
57

58 **Figure legend** Figure 1 COVID-19 in Victoria during 2020. Data Collection Timeline  
59  
60

1  
2  
3  
4  
5  
6  
7  
8  
9  
10  
11  
12  
13  
14  
15  
16  
17  
18  
19  
20  
21  
22  
23  
24  
25  
26  
27  
28  
29  
30  
31  
32  
33  
34  
35  
36  
37  
38  
39  
40  
41  
42  
43  
44  
45  
46  
47  
48  
49  
50  
51  
52  
53  
54  
55  
56  
57  
58  
59  
60

For peer review only



Figure 1 COVID-19 in Victoria during 2020. Data Collection Timeline

246x99mm (150 x 150 DPI)

## COREQ (COnsolidated criteria for REporting Qualitative research) Checklist

A checklist of items that should be included in reports of qualitative research. You must report the page number in your manuscript where you consider each of the items listed in this checklist. If you have not included this information, either revise your manuscript accordingly before submitting or note N/A.

| Topic                                          | Item No. | Guide Questions/Description                                                                                                                              | Reported on Page No. |
|------------------------------------------------|----------|----------------------------------------------------------------------------------------------------------------------------------------------------------|----------------------|
| <b>Domain 1: Research team and reflexivity</b> |          |                                                                                                                                                          |                      |
| <i>Personal characteristics</i>                |          |                                                                                                                                                          |                      |
| Interviewer/facilitator                        | 1        | Which author/s conducted the interview or focus group?                                                                                                   |                      |
| Credentials                                    | 2        | What were the researcher's credentials? E.g. PhD, MD                                                                                                     |                      |
| Occupation                                     | 3        | What was their occupation at the time of the study?                                                                                                      |                      |
| Gender                                         | 4        | Was the researcher male or female?                                                                                                                       |                      |
| Experience and training                        | 5        | What experience or training did the researcher have?                                                                                                     |                      |
| <i>Relationship with participants</i>          |          |                                                                                                                                                          |                      |
| Relationship established                       | 6        | Was a relationship established prior to study commencement?                                                                                              |                      |
| Participant knowledge of the interviewer       | 7        | What did the participants know about the researcher? e.g. personal goals, reasons for doing the research                                                 |                      |
| Interviewer characteristics                    | 8        | What characteristics were reported about the interviewer/facilitator? e.g. Bias, assumptions, reasons and interests in the research topic                |                      |
| <b>Domain 2: Study design</b>                  |          |                                                                                                                                                          |                      |
| <i>Theoretical framework</i>                   |          |                                                                                                                                                          |                      |
| Methodological orientation and Theory          | 9        | What methodological orientation was stated to underpin the study? e.g. grounded theory, discourse analysis, ethnography, phenomenology, content analysis |                      |
| <i>Participant selection</i>                   |          |                                                                                                                                                          |                      |
| Sampling                                       | 10       | How were participants selected? e.g. purposive, convenience, consecutive, snowball                                                                       |                      |
| Method of approach                             | 11       | How were participants approached? e.g. face-to-face, telephone, mail, email                                                                              |                      |
| Sample size                                    | 12       | How many participants were in the study?                                                                                                                 |                      |
| Non-participation                              | 13       | How many people refused to participate or dropped out? Reasons?                                                                                          |                      |
| <i>Setting</i>                                 |          |                                                                                                                                                          |                      |
| Setting of data collection                     | 14       | Where was the data collected? e.g. home, clinic, workplace                                                                                               |                      |
| Presence of non-participants                   | 15       | Was anyone else present besides the participants and researchers?                                                                                        |                      |
| Description of sample                          | 16       | What are the important characteristics of the sample? e.g. demographic data, date                                                                        |                      |
| <i>Data collection</i>                         |          |                                                                                                                                                          |                      |
| Interview guide                                | 17       | Were questions, prompts, guides provided by the authors? Was it pilot tested?                                                                            |                      |
| Repeat interviews                              | 18       | Were repeat interviews carried out? If yes, how many?                                                                                                    |                      |
| Audio/visual recording                         | 19       | Did the research use audio or visual recording to collect the data?                                                                                      |                      |
| Field notes                                    | 20       | Were field notes made during and/or after the interview or focus group?                                                                                  |                      |
| Duration                                       | 21       | What was the duration of the interviews or focus group?                                                                                                  |                      |
| Data saturation                                | 22       | Was data saturation discussed?                                                                                                                           |                      |
| Transcripts returned                           | 23       | Were transcripts returned to participants for comment and/or                                                                                             |                      |

| Topic                                  | Item No. | Guide Questions/Description                                                                                                        | Reported on Page No. |
|----------------------------------------|----------|------------------------------------------------------------------------------------------------------------------------------------|----------------------|
|                                        |          | correction?                                                                                                                        |                      |
| <b>Domain 3: analysis and findings</b> |          |                                                                                                                                    |                      |
| <i>Data analysis</i>                   |          |                                                                                                                                    |                      |
| Number of data coders                  | 24       | How many data coders coded the data?                                                                                               |                      |
| Description of the coding tree         | 25       | Did authors provide a description of the coding tree?                                                                              |                      |
| Derivation of themes                   | 26       | Were themes identified in advance or derived from the data?                                                                        |                      |
| Software                               | 27       | What software, if applicable, was used to manage the data?                                                                         |                      |
| Participant checking                   | 28       | Did participants provide feedback on the findings?                                                                                 |                      |
| <i>Reporting</i>                       |          |                                                                                                                                    |                      |
| Quotations presented                   | 29       | Were participant quotations presented to illustrate the themes/findings?<br>Was each quotation identified? e.g. participant number |                      |
| Data and findings consistent           | 30       | Was there consistency between the data presented and the findings?                                                                 |                      |
| Clarity of major themes                | 31       | Were major themes clearly presented in the findings?                                                                               |                      |
| Clarity of minor themes                | 32       | Is there a description of diverse cases or discussion of minor themes?                                                             |                      |

Developed from: Tong A, Sainsbury P, Craig J. Consolidated criteria for reporting qualitative research (COREQ): a 32-item checklist for interviews and focus groups. *International Journal for Quality in Health Care*. 2007. Volume 19, Number 6: pp. 349 – 357

**Once you have completed this checklist, please save a copy and upload it as part of your submission. DO NOT include this checklist as part of the main manuscript document. It must be uploaded as a separate file.**

# BMJ Open

## At the Edge of Chaos: A prospective multiple case study in Australian General Practices adapting to COVID-19

|                                 |                                                                                                                                                                                                                                                                                                                                                                                                                                                                                                                                                                                                                                                                                                                                                                                                                                                                                                                                                                                                                                                         |
|---------------------------------|---------------------------------------------------------------------------------------------------------------------------------------------------------------------------------------------------------------------------------------------------------------------------------------------------------------------------------------------------------------------------------------------------------------------------------------------------------------------------------------------------------------------------------------------------------------------------------------------------------------------------------------------------------------------------------------------------------------------------------------------------------------------------------------------------------------------------------------------------------------------------------------------------------------------------------------------------------------------------------------------------------------------------------------------------------|
| Journal:                        | <i>BMJ Open</i>                                                                                                                                                                                                                                                                                                                                                                                                                                                                                                                                                                                                                                                                                                                                                                                                                                                                                                                                                                                                                                         |
| Manuscript ID                   | bmjopen-2022-064266.R2                                                                                                                                                                                                                                                                                                                                                                                                                                                                                                                                                                                                                                                                                                                                                                                                                                                                                                                                                                                                                                  |
| Article Type:                   | Original research                                                                                                                                                                                                                                                                                                                                                                                                                                                                                                                                                                                                                                                                                                                                                                                                                                                                                                                                                                                                                                       |
| Date Submitted by the Author:   | 20-Oct-2022                                                                                                                                                                                                                                                                                                                                                                                                                                                                                                                                                                                                                                                                                                                                                                                                                                                                                                                                                                                                                                             |
| Complete List of Authors:       | Russell, Grant; Monash University Faculty of Medicine Nursing and Health Sciences, Department of General Practice<br>Lane, Riki; Monash University Faculty of Medicine Nursing and Health Sciences, Department of General Practice; Monash Health, Gender Clinic<br>Neil, Jennifer; Monash University Faculty of Medicine Nursing and Health Sciences, Department of General Practice<br>Advocat, Jenny; Monash University, Department of General Practice<br>Sturgiss, Elizabeth; Monash University, Department of General Practice<br>Staunton Smith, Timothy; Monash University Faculty of Medicine Nursing and Health Sciences, School of Primary Health Care<br>Alexander, Karyn; Monash University Faculty of Medicine Nursing and Health Sciences<br>Hattle, Simon; Monash University Faculty of Medicine Nursing and Health Sciences<br>Crabtree, Benjamin; Rutgers Robert Wood Johnson Medical School, Department of Family Medicine and Community Health, Research Division<br>Miller, William; Lehigh Valley Health Network, Family Medicine |
| <b>Primary Subject Heading</b>: | General practice / Family practice                                                                                                                                                                                                                                                                                                                                                                                                                                                                                                                                                                                                                                                                                                                                                                                                                                                                                                                                                                                                                      |
| Secondary Subject Heading:      | Qualitative research, Infectious diseases                                                                                                                                                                                                                                                                                                                                                                                                                                                                                                                                                                                                                                                                                                                                                                                                                                                                                                                                                                                                               |
| Keywords:                       | PRIMARY CARE, Health policy < HEALTH SERVICES ADMINISTRATION & MANAGEMENT, Change management < HEALTH SERVICES ADMINISTRATION & MANAGEMENT, VIROLOGY                                                                                                                                                                                                                                                                                                                                                                                                                                                                                                                                                                                                                                                                                                                                                                                                                                                                                                    |
|                                 |                                                                                                                                                                                                                                                                                                                                                                                                                                                                                                                                                                                                                                                                                                                                                                                                                                                                                                                                                                                                                                                         |

SCHOLARONE™  
Manuscripts



I, the Submitting Author has the right to grant and does grant on behalf of all authors of the Work (as defined in the below author licence), an exclusive licence and/or a non-exclusive licence for contributions from authors who are: i) UK Crown employees; ii) where BMJ has agreed a CC-BY licence shall apply, and/or iii) in accordance with the terms applicable for US Federal Government officers or employees acting as part of their official duties; on a worldwide, perpetual, irrevocable, royalty-free basis to BMJ Publishing Group Ltd ("BMJ") its licensees and where the relevant Journal is co-owned by BMJ to the co-owners of the Journal, to publish the Work in this journal and any other BMJ products and to exploit all rights, as set out in our [licence](#).

The Submitting Author accepts and understands that any supply made under these terms is made by BMJ to the Submitting Author unless you are acting as an employee on behalf of your employer or a postgraduate student of an affiliated institution which is paying any applicable article publishing charge ("APC") for Open Access articles. Where the Submitting Author wishes to make the Work available on an Open Access basis (and intends to pay the relevant APC), the terms of reuse of such Open Access shall be governed by a Creative Commons licence – details of these licences and which [Creative Commons](#) licence will apply to this Work are set out in our licence referred to above.

Other than as permitted in any relevant BMJ Author's Self Archiving Policies, I confirm this Work has not been accepted for publication elsewhere, is not being considered for publication elsewhere and does not duplicate material already published. I confirm all authors consent to publication of this Work and authorise the granting of this licence.



1  
2  
3 Title page  
4  
5

6 **At the Edge of Chaos: A prospective multiple case study in Australian General Practices**  
7  
8 **adapting to COVID-19**  
9  
10

11  
12  
13  
14  
15 Grant Russell<sup>1</sup> MBBS, PhD Professor of Primary Care Research  
16

17 Riki Lane<sup>1</sup> PhD Research Fellow  
18

19  
20 Jennifer Neil<sup>1</sup> MBBS(Hons) Clinical Educator  
21

22  
23 Jenny Advocat<sup>4</sup> PhD, Research Fellow  
24

25 Elizabeth Sturgiss<sup>4</sup>, MBBS, PhD Senior Research Fellow  
26

27  
28 Tim Staunton Smith MBBS Clinical Educator  
29

30 Karyn Alexander<sup>1</sup>, MBChB, PhD Clinical Educator  
31

32  
33 Simon Hattle<sup>1</sup>, MBBS (Hons) Clinical Educator  
34

35  
36 Benjamin F. Crabtree<sup>2</sup>, PhD Distinguished Professor  
37

38  
39 William L Miller<sup>3</sup>, MD Professor of Family Medicine  
40  
41  
42  
43

44 1 Department of General Practice, Monash University  
45

46 2 Department of Family Medicine and Community Health, Rutgers Robert Wood Johnson Medical School  
47

48  
49 3 Department of Family Medicine, Lehigh Valley Health Network  
50

51  
52 4 School of Primary and Allied Health Care, Monash University.  
53

54 **Corresponding author** Grant Russell. Building 1, 270 Ferntree Gully Rd, Notting Hill 3168, Victoria,  
55  
56 Australia. Mobile: +61 400467310 Email: grant.russell@monash.edu  
57  
58  
59  
60

1  
2  
3  
4  
5  
6  
7  
8  
9  
10  
11  
12  
13  
14  
15  
16  
17  
18  
19  
20  
21  
22  
23  
24  
25  
26  
27  
28  
29  
30  
31  
32  
33  
34  
35  
36  
37  
38  
39  
40  
41  
42  
43  
44  
45  
46  
47  
48  
49  
50  
51  
52  
53  
54  
55  
56  
57  
58  
59  
60

**Word count** for the main text (excluding title page, abstract, strengths and limitations, abbreviations, tables, references, figure) 4435.

For peer review only

1  
2  
3 Abstract  
4  
5

6 **Objectives:** The rapid onset and progressive course of the COVID-19 pandemic challenged  
7  
8 primary care practices to generate rapid solutions to unique circumstances; creating a  
9  
10 natural experiment of effectiveness, resilience, financial stability and governance across  
11  
12 primary care models. We aimed to characterize how practices in Melbourne Australia  
13  
14 modified clinical and organizational routines in response to the pandemic in 2020-21 and  
15  
16 identify factors that influenced these changes.  
17  
18

19  
20 **Design:** Prospective, qualitative, participatory, case study design using constant  
21  
22 comparative data analysis, conducted between April 2020 and February 2021. Participant  
23  
24 general practitioner (GP) investigators were involved in study design, recruitment of other  
25  
26 participants, data collection and analysis. Data analysis included investigator diaries,  
27  
28 structured practice observation, documents and interviews.  
29  
30

31  
32 **Setting:** The cases were six Melbourne practices of varying size and organizational model.  
33  
34

35 **Participants:** GP investigators approached potential participants. Practice healthcare  
36  
37 workers were interviewed by social scientists on three occasions, and provided feedback on  
38  
39 presentations of preliminary findings.  
40  
41

42 **Results:** We conducted 58 interviews with 26 practice healthcare workers including  
43  
44 practice owners, practice managers, GPs, receptionists and nurses; and six interviews with  
45  
46 GP Investigators. Data saturation was achieved within each practice and across the sample.  
47  
48 The pandemic generated changes to triage, clinical care, infection control and  
49  
50 organizational routines, particularly around telehealth. While collaboration and trust  
51  
52 increased within several practices, others fragmented, leaving staff isolated and  
53  
54 demoralized. Financial and organizational stability, collaborative problem solving, creative  
55  
56 leadership, and communication (internally and within the broader healthcare sector) were  
57  
58 major influences on practices' ability to negotiate the pandemic.  
59  
60

1  
2  
3 **Conclusions:** This study demonstrates the complex influences on primary care practices,  
4  
5 and reinforces the strengths of clinician participation in research design, conduct and  
6  
7 analysis. Two implications are: telehealth, triage and infection management innovations  
8  
9 are likely to continue; the existing payments system provides inadequate support to  
10  
11 primary care in a global pandemic.  
12  
13

#### 14 15 Strengths and limitations of this study

- 16  
17  
18  
19 ► Our prospective case study design provided a detailed understanding of the evolution of clinical  
20  
21 and organisational routines within Australian general practices of varying models through the first  
22  
23 year of the COVID-19 pandemic.  
24  
25  
26 ► Our use of GPs as participant investigators overcame the challenges of recruiting and collecting  
27  
28 data from practices at a time when external researchers were unable to enter practices due to  
29  
30 public health restrictions.  
31  
32  
33 ► The credibility of our findings are increased by the multi-method data collection strategy  
34  
35 (providing a detailed, intensive exploration of individuals and organisations in context) and our  
36  
37 presentation of emergent findings to practice teams.  
38  
39  
40 ► Practices were all from Melbourne, the region in Australia that experienced both the highest  
41  
42 COVID case numbers and most prolonged and extensive lockdowns during 2020.  
43  
44  
45 ► Different practice routines may have emerged in other contexts, such as rural practices and those  
46  
47 with no association with a University Department of General Practice.  
48  
49  
50  
51  
52  
53  
54  
55  
56  
57  
58  
59  
60

Table 1: Abbreviations

|      |                                       |
|------|---------------------------------------|
| AOD  | Alcohol and other drug                |
| CALD | Culturally and linguistically diverse |
| CDM  | Chronic disease management            |
| CHC  | Community Health Centre               |
| FTE  | Full Time Equivalent                  |
| GP   | General Practitioner                  |
| MBS  | Medical Benefits Schedule             |
| N    | Nurse                                 |
| PPE  | Personal Protective Equipment         |
| PM   | Practice manager                      |
| PO   | Practice owner                        |
| R    | Reception staff                       |
| SES  | Socio-economic status                 |

## INTRODUCTION

The COVID-19 pandemic has challenged healthcare systems<sup>1</sup> and generated major changes in the delivery of primary care.<sup>2</sup> While Australia was spared high COVID-19 mortality during 2020,<sup>3</sup> two-thirds of 2020 COVID cases and nearly 90% of deaths were in the Melbourne metropolitan region (population 5.1 million), following a four-month outbreak. In response, between July and October 2020, the Victorian state government imposed one of the world's most stringent lockdowns.<sup>4</sup>

Both federal and state governments in Australia stressed the importance of primary care to the overall pandemic response. Australian primary care is largely delivered through a network of small, owner-operated general practices. Ten percent of practices are owned by large corporate entities,<sup>5</sup> and most states have a small number of comprehensive primary health care organizations, similar to Community Health Centres (CHCs) in other nations (see Table 1 for a list of all abbreviations).<sup>6</sup> Under Australia's federal government single-payer insurance scheme, the Medical Benefits Schedule (MBS), general practitioners (GPs) are paid a standard amount for each consultation, and can either accept that payment ("bulk-bill"), or charge an additional "co-payment" to the patient.

While complex systems such as primary care are generally robust,<sup>7</sup> situations of instability can generate an 'edge of chaos' state between *"equilibrium and complete disorder where systems have the potential to be most adaptive and creative"*,<sup>8</sup> but where *"systems that do not successfully change can become extinct"*.<sup>9</sup> The early phase of the pandemic generated such a scenario within Australian general practice.

There is limited research on the experiences of primary care practices providing care within the systemic strains caused by the pandemic. We asked: a) what changes to clinical and organizational routines were made during the first year of the pandemic; and b) what contextual, organizational and individual factors facilitated these changes? We anticipated

1  
2  
3 that addressing these questions would provide insights into the adaptivity and robustness  
4  
5 of the primary care system within Australia.  
6  
7

## 8 **METHODS**

9

10  
11 **Design:** We used a participatory, prospective qualitative case study<sup>10</sup> design, within which  
12  
13  
14 GP participant investigators shaped the project, and contributed to data collection and  
15  
16 analysis.<sup>11</sup> Design was informed by principles of participatory action research in which  
17  
18 processes of planning, action and reflection are conducted in close collaboration with  
19  
20 stakeholders and participants (here referring to both GP investigators and practice owners  
21  
22 and other staff).<sup>12</sup> Our methodology (including data collection tools, and approach to  
23  
24 analysis) has been detailed elsewhere,<sup>12</sup> and data collection is summarised below.  
25  
26  
27

28  
29 GP investigators comprised four clinician educators (JN, KA, SH and TSS) and two clinician  
30  
31 researchers (GR and ES), alongside two social science research fellows (JA and RL) with  
32  
33 PhDs and experience in qualitative research. Each investigator was affiliated with a single  
34  
35 University Department of General Practice. WM and BC acted as external advisors.  
36  
37

38 The practices constituted the cases being compared; they were the unit of analysis.

39  
40 Investigators were clinicians at these practices, and social scientists. Data sources were GP  
41  
42 investigator observations, practice documents, interviews with practice clinicians and staff,  
43  
44 responses to a presentation of interim findings to practices, and reflective interviews with  
45  
46 GP investigators.  
47  
48  
49

50 **Setting and participants:** The study was set in six general practices of varying size and  
51  
52 organizational model in metropolitan Melbourne. Aligned with the participatory approach, practices  
53  
54 were chosen from locations where GP investigators based their clinical work. GR and EAS contacted  
55  
56 potential participant investigators from GPs who were either current academic staff or recent PhD  
57  
58 graduates of the Department of General Practice, prioritising those working within practices of  
59  
60

1  
2  
3 varying size and organisational model.<sup>12</sup> Practice interview participants included GPs, nurses,  
4  
5 practice managers and administrative staff. The GP investigators gained written informed consent  
6  
7 from practice participants; the social scientists gained written consent from GP investigators for  
8  
9 their reflective interviews. Data were collected between April 2020 and February 2021.  
10  
11

12  
13 **Data collection:** The GP investigators used structured diaries to record their experiences. They  
14  
15 completed a practice description tool;<sup>13, 14</sup> collated and photographed practice documents, signage  
16  
17 and layout, and provided continuing input to data collection. RL and JA conducted semi-structured,  
18  
19 in-depth, audio recorded telephone or videoconference interviews (30-60 minutes) with clinicians  
20  
21 and administrative staff from each practice at three time points (see Figure 1). Subsequently, each  
22  
23 GP investigator was interviewed once in early 2021, to reflect on data collected and their  
24  
25 experiences. Interviews focused upon participants' individual experiences, perceived practice  
26  
27 responses, and beliefs about factors influencing practice performance. Practice staff were invited to  
28  
29 attend live video presentations by investigators of emerging findings at mid and end of project.  
30  
31 Responses were collected and informed analysis.  
32  
33  
34  
35

36  
37 **Data management:** All digital data was stored on a secure server only accessible by JA, RL and  
38  
39 project manager SC. Interviews were professionally transcribed and all identifying information  
40  
41 removed. Interview transcripts and observational data (diaries, practice documents and field notes)  
42  
43 were coded by JA and RL using NVivo <sup>12, 15</sup> Our iterative coding template was based on concepts from  
44  
45 Miller, et al's Relationship Centred Model of Primary Care Practice Development,<sup>16</sup> themes derived  
46  
47 from initial reading and familiarisation with the raw data, and further emerging data themes.  
48  
49  
50  
51  
52  
53  
54  
55  
56  
57  
58  
59  
60



1  
2  
3 **Data analysis:** Data analysis used a constant comparative approach<sup>17</sup> informed by prior  
4 approaches to investigation of primary care practice routines.<sup>14, 18</sup> JA and RL undertook data  
5 analysis, which was refined at regular meetings with GR and JN, and at a data retreat<sup>19</sup> with  
6 all investigators.  
7  
8  
9  
10

11  
12  
13 The use of matrices facilitated cross case comparisons.<sup>20</sup> An initial matrix organized summarized data  
14 under thematic codes (rows) versus practices (columns). Subsequently, further summarized matrices  
15 were used to generate narratives, which described the key elements of changes in each practice. As  
16 outlined in the protocol paper, intervention narratives and the matrices were further analysed  
17 through cross-case analysis to develop hypotheses to explain the implementation, uptake and  
18 sustainability of routine changes that followed the commencement of the pandemic.<sup>12</sup> Secondary  
19 analysis on the themes of leadership and staff burden has informed subsequent journal article  
20 submissions. Reporting followed Tong et al's consolidated criteria for reporting qualitative  
21 research.<sup>21</sup>  
22  
23  
24  
25  
26  
27  
28  
29  
30  
31  
32  
33

34 **Public and patient involvement statement:** Given limitations imposed by the pandemic on  
35 interaction with members of the community, this research was carried out without patient  
36 involvement.  
37  
38  
39  
40

## 41 42 **RESULTS**

43  
44  
45 We recruited six of eight practices approached. One practice was part of a federal and state funded  
46 Community Health Centre, another was part of a large corporate network and the remainder were  
47 general practices of varying size, organizational structure, billing practices and patient  
48 characteristics. (See Table 2). All were organizationally and financially stable prior to the pandemic.  
49 We conducted 58 interviews with 26 practice staff including practice owners (PO), practice managers  
50 (PM), GPs, reception staff (R), and nurses (N) and six interviews with GP Investigators. Data  
51 saturation was achieved at the level of each practice and across the sample. The CHC-based  
52  
53  
54  
55  
56  
57  
58  
59  
60

1  
2  
3  
4  
5  
6  
7  
8  
9  
10  
11  
12  
13  
14  
15  
16  
17  
18  
19  
20  
21  
22  
23  
24  
25  
26  
27  
28  
29  
30  
31  
32  
33  
34  
35  
36  
37  
38  
39  
40  
41  
42  
43  
44  
45  
46  
47  
48  
49  
50  
51  
52  
53  
54  
55  
56  
57  
58  
59  
60

investigator left the practice in August 2020. Subsequently, another GP working at the practice provided liaison, but did not collect data.

For peer review only

Table 2. Participating practices

| PRACTICE PSEUDONYM | TYPE OF PRACTICE                                | LOCATION                  | BILLING SYSTEM <sup>1</sup> | PRACTICE POPULATION                                                     | GPS FTE IN PRACTICE | NURSES FTE IN PRACTICE | ALLIED HEALTH DISCIPLINES                                                                 |
|--------------------|-------------------------------------------------|---------------------------|-----------------------------|-------------------------------------------------------------------------|---------------------|------------------------|-------------------------------------------------------------------------------------------|
| <b>CHC</b>         | Community Health Centre                         | Inner city suburbs        | Bulk billing                | Lower SES <sup>2</sup> , CALD <sup>3</sup> , refugees, AOD <sup>4</sup> | 6 FTE <sup>5</sup>  | 5                      | Numerous health and social care disciplines                                               |
| <b>SE1</b>         | Private General Practice                        | South-eastern suburbs     | Blended                     | High SES, children and elderly                                          | 3.5 FTE             | 2                      | Dentist                                                                                   |
| <b>E</b>           | Private General Practice                        | Eastern suburbs           | Blended                     | High SES, very few CALD                                                 | 4-5 FTE             | 1 FTE (3 in total)     | Diabetes educator                                                                         |
| <b>CBD</b>         | Private General Practice                        | Central business district | Blended                     | Higher SES, Tourists, Multi-lingual GPs                                 | 3.5 FTE             | 1 FTE (2 in total)     | Clinical psychology                                                                       |
| <b>SE2</b>         | Private General Practice within large corporate | South-eastern suburbs     | Bulk billing                | Mid to low SES, broad patient mix                                       | 14 FTE              | 3.5FTE                 | Physiotherapy, dietetics                                                                  |
| <b>W</b>           | General Practice and Health Hub                 | Western suburbs           | Blended                     | Low SES, gentrifying                                                    | 15+ GPs             | 3.5 FTE                | Numerous co-located disciplines including psychology, dietetics, physiotherapy, podiatry. |

1 Bulk billing is where clinicians accept the Medicare benefit as full payment for the service. A blended system is where clinicians bulk bill some patients and require a co-payment from others.

2 SES: socio-economic status.

3 CALD: culturally and linguistically diverse patients.

4 AOD: alcohol and other drug patients

5 FTE: Full time equivalent

1  
2  
3  
4 Our team reflected on the time passage of the pandemic in its first year. We felt that the  
5  
6 data would be easier to understand if it were contextualised by stages. The names were  
7  
8 approved by consensus, and are intended to provide context through which to understand  
9  
10 the broad study findings.  
11

12  
13 Clinical and organizational routines evolved with the stages of the pandemic, patient  
14  
15 demand and changes to MBS telehealth payments. Pre-pandemic plans required for  
16  
17 practice accreditation prior to 2020 had minimal influence, and practices struggled with  
18  
19 conflicting advice from government and professional organizations at times. Stability of the  
20  
21 practice core, functional leadership, organizational model and communication were major  
22  
23 influences on the ability of practices to modify routines to complex and unpredictable  
24  
25 challenges. We begin by describing the evolution of the pandemic within the practices,  
26  
27 followed by an interpretation of the drivers of routine change seen through the lens of the  
28  
29 relationship centred model.  
30  
31  
32

### 33 ***Early chaos (February 2020 - April 2020)***

34  
35  
36 Practices began to be aware of the pandemic's implications in February 2020:  
37

38  
39 *We expected to be overwhelmed with very sick people and we were basing that*  
40  
41 *on what was happening in other countries... we had plans for home palliation,*  
42  
43 *staggered staff shifts in case one shift was infected and the Health Department*  
44  
45 *ordered everyone on that shift to disappear, so week on, week off. (CHC GP2)*  
46  
47  
48

49 The subsequent weeks were chaotic, as workplaces changed overnight:  
50

51  
52 *For two weeks at the very beginning, like early-mid March, it was absolute chaos.*  
53  
54 *Just in terms of the volume of patients that were calling non-stop. Mostly phone*  
55  
56 *calls, and mostly people really desperately wanting testing.... At first it was like*  
57  
58  
59  
60

1  
2  
3 *very overwhelming, but then it became a new norm to just, "This is the new thing.*  
4  
5 *Do it. Adapt, adapt, adapt." (CBD R)*  
6  
7

8 Many staff became increasingly frustrated by shortages of Personal Protective Equipment  
9 (PPE) and changing advice from government and professional bodies. They were concerned  
10 for their safety and that of their families and about the potential impact of rapid  
11 community transmission. The MBS broadened eligibility for telehealth consultations  
12 (previously limited to rural and remote areas), allowing some older GPs and other  
13 vulnerable staff to work from home, which increased the complexity of receptionists' work.  
14  
15  
16  
17  
18  
19  
20  
21

### 22 ***Emerging stability (May 2020 - June 2020)***

23  
24  
25 With cases falling, Victoria's community lockdown was lifted in late May. After the early  
26 disruption, the impact was less than feared:  
27  
28  
29

30 *The initial tension, anxiety, shock where people saw the horrendous news items*  
31 *from overseas: you could sense that in the doctors here, and the staff. ... so*  
32 *initially there was a run for shelter.. ... People feel as if things are well controlled*  
33 *and reasonably calm at the moment in terms of illness. (SE2 GP)*  
34  
35  
36  
37  
38  
39

40 All practices had incorporated fundamental changes to their work routines (see Table 3):  
41

42 i) *Keeping staff and patients safe.* Once problems sourcing PPE were partially resolved,  
43 practices began to prioritise creation of a COVID-19 safe workplace. Clinicians began  
44 wearing scrubs, room ventilation and cleaning was improved and physical barriers and  
45 isolation areas were introduced. These came with major changes in screening, triage and  
46 booking routines. Online appointment booking was paused or amended at all practices –  
47 reception staff screened all patients for COVID-19 infection risk by telephone, while  
48 informing them about requirements relating to safety, telehealth and billing. These  
49 infection control approaches varied between practices.  
50  
51  
52  
53  
54  
55  
56  
57  
58  
59  
60

1  
2  
3 *ii) Re-aligned clinical work.* Telehealth had major impacts on clinical care delivery.  
4

5 Telephone, rather than video, consultations predominated due to GP preferences and  
6  
7 some patient technological constraints. There was significant concern about patient  
8  
9 unwillingness to attend in person, and GPs often viewed telehealth as inadequate for  
10  
11 delivering quality care, especially for systematic chronic disease management (CDM).  
12  
13

14 *iii) Practice management.* To limit virus transmission risk, practice staff began  
15

16 communicating differently with each other. (See Table 4) Face to face meetings ceased,  
17  
18 replaced by emails, and in some practices, smart phone apps and virtual meetings. Formal  
19  
20 practice meetings were mostly held infrequently. Practice owners in the small private  
21  
22 practices made decisions to change routines, often unilaterally. GPs became increasingly  
23  
24 concerned about losing income due to reduced patient demand and an initial government  
25  
26 mandate to bulk bill all telehealth consultations.  
27  
28  
29  
30  
31  
32  
33  
34  
35  
36  
37  
38  
39  
40  
41  
42  
43  
44  
45  
46  
47  
48  
49  
50  
51  
52  
53  
54  
55  
56  
57  
58  
59  
60

Table 3. Key pandemic generated modifications to safety, clinical, workflow and practice management routines.

| WORKFLOW ROUTINE                                            | DEFINITION                                                                            | DESCRIPTION OF CHANGES                                                                                                                                                                                                                                                                                                                                                                                                                                                                                                                                                                                                                                                                                                                                                                                                                                                                                                                                                                                                                                                                                |
|-------------------------------------------------------------|---------------------------------------------------------------------------------------|-------------------------------------------------------------------------------------------------------------------------------------------------------------------------------------------------------------------------------------------------------------------------------------------------------------------------------------------------------------------------------------------------------------------------------------------------------------------------------------------------------------------------------------------------------------------------------------------------------------------------------------------------------------------------------------------------------------------------------------------------------------------------------------------------------------------------------------------------------------------------------------------------------------------------------------------------------------------------------------------------------------------------------------------------------------------------------------------------------|
| <b>1 KEEPING STAFF AND PATIENTS SAFE</b>                    | Procedures to reduce infectious disease transmission                                  | <p>Increased PPE use; enhanced cleaning practices by external cleaners and practice staff.</p> <p>Patient waiting routines e.g. changed waiting room layout; wait in their car/outside until appointment times.</p> <p>Booking processes: All practices paused patient ability to make appointments online. Receptionists began to check respiratory symptoms and travel/contact history during patient booking for appointments by telephone and on arrival.</p> <p>Staff-to staff contact reduced greatly: such as closed lunch rooms, lunch to be eaten in rooms and in some practices the wearing of surgical scrubs. <i>(Impacts on routine 3)</i></p>                                                                                                                                                                                                                                                                                                                                                                                                                                           |
| <b>2 RE-ALIGNED CLINICAL WORK</b>                           |                                                                                       |                                                                                                                                                                                                                                                                                                                                                                                                                                                                                                                                                                                                                                                                                                                                                                                                                                                                                                                                                                                                                                                                                                       |
| <b>2.1 TELEHEALTH</b>                                       | Procedures for conducting consultations via phone or video, rather than face to face. | <p>All practices began using telehealth for many consultations – enabled by changed MBS funding for telehealth (previously limited to rural and remote areas).</p> <p>All practices remained open for face to face consultations (usually with almost all GPs on site). Most GPs provided telehealth from the practice, but some worked from home when isolating or unwell or if they had personal risk factors such as advanced age or chronic disease:</p> <ul style="list-style-type: none"> <li>• Difficulties due to lack of required technology at home; providing access to patient data base, printing, faxing and billing.</li> <li>• At CHC all but two GPs worked from home; management provided home technology.</li> </ul> <p>GPs overwhelmingly used phone rather than video:</p> <ul style="list-style-type: none"> <li>• Reluctance to use video due to difficulties with logistics, practices' technology, and perceived ability for patients and/or GP to access and use technology.</li> </ul> <p>Receptionists needed to be aware of significantly modified billing schedule.</p> |
| <b>2.2 CASE MANAGEMENT CHRONIC ILLNESS/ CARE CONTINUITY</b> | Procedures for management of patients' ongoing health conditions                      | <p>All practices initially paused: Chronic Disease Management recalls; cervical cancer screening; 45-49 and 75+ year old health checks:</p> <ul style="list-style-type: none"> <li>• Major concerns about missed diagnosis with telehealth and patient reluctance to attend GP and/or hospital.</li> </ul> <p>Different approaches and timing for resuming chronic disease management follow ups – often financially driven in view of falling practice income:</p>                                                                                                                                                                                                                                                                                                                                                                                                                                                                                                                                                                                                                                   |

1  
2  
3  
4  
5  
6  
7  
8  
9  
10  
11  
12  
13  
14  
15  
16  
17  
18  
19  
20  
21  
22  
23  
24  
25  
26  
27  
28  
29  
30  
31  
32  
33  
34  
35  
36  
37  
38  
39  
40  
41  
42  
43  
44  
45  
46

|                               |                                                    |                                                                                                                                                                                                                                                                                                                                                                                                                                                                                                                                                                    |
|-------------------------------|----------------------------------------------------|--------------------------------------------------------------------------------------------------------------------------------------------------------------------------------------------------------------------------------------------------------------------------------------------------------------------------------------------------------------------------------------------------------------------------------------------------------------------------------------------------------------------------------------------------------------------|
|                               |                                                    | <ul style="list-style-type: none"> <li>Primarily conducted via phone or video with the assistance of the practice nurse.</li> </ul>                                                                                                                                                                                                                                                                                                                                                                                                                                |
| <b>3) PRACTICE MANAGEMENT</b> | Procedures for coordination between practice staff | <p>Staff meetings: Pre-existing large variation between practices in frequency and attendance:<br/> Shift to online meetings: excludes some, but includes others.<br/> Some practices increased meetings, others decreased them.</p> <p>Major loss in collegiality:<br/> Infection control obstructs social interaction and makes it more difficult to gain second opinions from practice colleagues.<br/> Especially where many staff work from home (as in the CHC)<br/> Online forums, meetings, phone calls assist, but exclude non-GPs in some practices.</p> |

peer review only



Table 4. Practice meetings and communication.

| Practice | Meeting routines                                                                                                  |                                                                                                                                                    |                                                                                                                  |                                                                    | Communication Tools                                                                                                                                                           |
|----------|-------------------------------------------------------------------------------------------------------------------|----------------------------------------------------------------------------------------------------------------------------------------------------|------------------------------------------------------------------------------------------------------------------|--------------------------------------------------------------------|-------------------------------------------------------------------------------------------------------------------------------------------------------------------------------|
|          | Pre COVID                                                                                                         | Early Chaos                                                                                                                                        | Emerging Stability                                                                                               | 2 <sup>nd</sup> Wave                                               |                                                                                                                                                                               |
| CHC      | Monthly / as required- all staff                                                                                  | Twice weekly                                                                                                                                       | Weekly Zoom (open to all staff, most attend, even on days off for some). Increased attendance from pre-pandemic. | As previous                                                        | Set up WhatsApp group at start of COVID-19 (for general staff communication)                                                                                                  |
| SE1      | GPs every 2 to 3 months, decided by owner.                                                                        | Weekly Zoom from May 2020. Generated by employed doctor advocacy.                                                                                  | Weekly Zoom – only GPs.                                                                                          | As previous                                                        | WhatsApp group for GPs at start of COVID-19                                                                                                                                   |
| E        | Every 1 or 2 months                                                                                               | Fortnightly by zoom; Nurses and receptionists not usually included                                                                                 | No change                                                                                                        | At peak of 2nd Wave, no meetings; leadership making all decisions. | Most communication by email                                                                                                                                                   |
| CBD      | Monthly                                                                                                           | Weekly, sometimes only GPs, sometimes Nurses. Also smaller informal meetings amongst GPs every morning                                             | Nurses stopped attending                                                                                         | As previous                                                        | WhatsApp group prior to COVID-19 but used more often during pandemic. WeChat group added.                                                                                     |
| SE2      | No all-staff meetings - off site managers only, no GP meetings, reception and nursing team have separate meetings | 1 GP meeting in March 2020, clinical investigator stepped up to clinical director, started regular meetings of PM, head nurse and medical director | No change                                                                                                        | No change                                                          | Medical director set up WhatsApp group for GPs in July to communicate changes to protocols, share thoughts, information - informal, not seen as good replacement for meetings |
| W        | Partners meet 1-2 times a month, GPs monthly lunch meeting, AGM                                                   | All staff weekly or fortnightly                                                                                                                    | No practice wide meetings since late March 2020                                                                  | As previous                                                        | Couple of WhatsApp groups, delegated nurse and doctor inactive during COVID-19                                                                                                |

### ***Negotiating a second wave (July 2020 – October 2020)***

In early July, rapidly increasing cases led to a strict four-month metropolitan Melbourne lockdown.<sup>22</sup> Despite case numbers reaching 700 per day, many participants across the practices felt their earlier changes had prepared them for the challenge. Clinicians became increasingly concerned about missed diagnoses and late presentations:

*[A patient has] really deteriorated in the last six weeks. ... I've had several telephone calls to persuade him to go into hospital, and eventually he did yesterday. I got him to agree to some blood tests... his liver has packed up. And he's jaundiced and I don't know if he will survive, but at least he's gone in. And if he hadn't have gone in, I would have said, "Oh no, what do I do now?" ... He would have died at home. (CHC GP1)*

Patients embraced telehealth, causing dilemmas for clinicians in maintaining quality care as a 'balance' between bringing patients to a potentially infectious location and dealing with the uncertainties of remote clinical care:

*We've put all sort of strict guidelines around what we think's suitable for telehealth and what's not. So, things like say mental health plans, basic administrative things like repeat scripts...referrals to other specialists... do that over the phone. But as soon as they start saying, "I've got abdominal pain," or, "I've got this thing on my arm, I'm not sure what it is," they've got to come in and have an appointment. (SE1 PO)*

Three practices began managing COVID-19 testing clinics:

*... we took over screening [from the Department of Health, because] They were taking up to two weeks to get a positive result to a patient. ... that was a significant increase in workload.... I pretty much worked seven days a week. I*

1  
2  
3 *think for three months I didn't have a day off, there were just lots of results*  
4 *coming through, notifications. The time taken to notify one positive result, to*  
5 *notify the Department of Health, could take one staff member two to three*  
6 *hours .... (CHC GP2)*  
7  
8  
9  
10  
11

12 As the lockdown continued, financial pressures from decreased practice income increased.  
13  
14 New staff vacancies were unfilled, and staff and clinicians were asked to take annual leave  
15 or reduce working hours. The privately owned practices sought to diversify income; training  
16 nurses in remote CDM, systematically calling patients for recall (most practices); or  
17 providing COVID-19 testing for asymptomatic travellers (CBD). The corporate's regional  
18 management modified CDM 'targets' to increase income. As cases rose, the CHC assumed  
19 responsibility for managing the pandemic response at nearby public housing towers, which  
20 required significant staffing resources and eventually attracted additional state  
21 government funding.  
22  
23  
24  
25  
26  
27  
28  
29  
30  
31  
32

### 33 ***Entering a new normal (November 2020 – February 2021)***

34

35  
36 Strict lockdown ended in late October 2020 and heralded an uneasy optimism. With new  
37 routines embedded, staff reflected on the consequences of the strain of the experience:  
38  
39

40  
41 *We're all pretty exhausted. And I've noticed - especially the past couple of*  
42 *months, I personally have been very, very short with patients. ... I don't indulge*  
43 *anyone at all anymore. I just say straight up this is how we work, you could*  
44 *come, you could not come. That's it. I'm not going to spend 10 minutes on the*  
45 *phone with you convincing you because I have so much work to do. (CBD R)*  
46  
47  
48  
49  
50  
51  
52  
53  
54  
55  
56  
57  
58  
59  
60

## Understanding the change

Our data showed that the characteristics of and variations between the practices in the organization and delivery of clinical care were driven by the health policy environment, local ecology and each practice's core and adaptive reserve.<sup>10</sup>

### ***Health Policy Environment***

While the Australian federal government provided no specific financial support to general practices during the pandemic, the impact was ameliorated by its 'JobKeeper' wage subsidy<sup>23</sup> and the introduction of MBS payments for telehealth. JobKeeper was only accessed by staff from one practice (CBD), but all made extensive use of telehealth. The federal government's Primary Health Networks<sup>24</sup> distributed some PPE as the months passed, although practices continued to need to source these privately. While practices were aware of, and often attentive to, a steady stream of government, Primary Health Networks and professional organization advice, shifting guidance with inadequate notice made it difficult to forge a consistent path.

### ***Local Ecology***

The pandemic's impact varied across metropolitan Melbourne – neighbourhoods surrounding practices W and CHC had four times as many COVID-19 infections compared to the other practices.<sup>25</sup> Practice W's (federally funded) on-site COVID-19 testing clinic was established prior to the first local infection, and was viewed as critical in keeping the general practice environment 'safe'. The rising incidence of COVID-19 in public housing towers close to the CHC led to extensive outreach services. The extensive changes adopted by the other practices were unrelated to local infection rates, although the CBD practice created a COVID-19 testing clinic to meet the needs of its overseas worker clientele who were required to obtain COVID-19 tests prior to returning home.

### ***Practice core***

The lack of formal external support or meaningful pandemic planning left the private practices internally focussed and needing to generate their own solutions to the pandemic challenges. The solutions and their uptake reflected the practices' organizational models and their leaders' internal models.

For example, the structure within SE2's corporate model (where early decision making was made by off-site regional managers) compounded local leaders' frustration and made it difficult for the practice to address the demands of the pandemic.

For all practices the introduction of MBS telehealth payments eased financial pressures that emerged with patients' increasing reluctance to seek face to face care. This required new routines to manage acute illness, plan prevention, and monitor CDM. Nevertheless, as the pandemic continued, financial pressures continued, with most practices reporting a 25-60% fall in income and adjustments to staffing to offset losses.

Government financial regulations generated some perverse incentives. During early pandemic phases, government funded telehealth consultations could not attract co-payments. As a result, several of the private practices began to encourage patients to attend the practice for face-to-face consultations, which still attracted private co-payments.

### ***Adaptive reserve***

Internal motivations were similar between practices. The early preoccupation was with a safe workplace focussed on structural changes, modifications to patient flow and an ongoing need for triage. As time passed, work was driven by desires to maintain both financial viability and quality clinical care. Most practice staff were increasingly concerned about their patient cohort's welfare, especially those with mental health conditions or complex chronic disease.

1  
2  
3 Leaders were key to adaptive reserve in the four privately owned practices and were critical to the  
4 maintenance of services in the CHC and the corporate practice. Within the CHC's complex external  
5 governance structure, management resources were rapidly redirected to the general practice, with  
6  
7 decision making mostly devolved to managers and staff members close to the general practice level.  
8  
9  
10  
11  
12 By contrast, at the four private practices, practice owners made most of the decisions, often with  
13  
14 minimal consultation with nurses, receptionists and contractor doctors:

15  
16  
17 *The practice principals have been taking a lot of unilateral decisions recently and there has*  
18 *not been a doctors' meeting for quite some time now. They even sent out an email asking for*  
19 *all the discussion to cease as they would be making the decisions from now on. I'm a bit*  
20 *worried it got everyone offside. (de-identified)*  
21  
22  
23  
24  
25

26  
27 Professional roles remained isolated and few leaders sought information from outside their own  
28 professional group. Pre-pandemic hierarchies between the owners and clinical and administrative  
29 staff were maintained and sometimes reinforced. Despite needing to "take on the lion's share of the  
30  
31 infection control and cleaning and [having] very high risk interactions" (de-identified), nurses were  
32  
33 rarely included in decision making.  
34  
35  
36  
37

38  
39 The data suggested occasional evolution of leadership approaches. The corporate practice (SE2)  
40 began with key decisions being made by the practice's regional management team. Practitioners and  
41  
42 staff feelings of disempowerment improved when a local leadership team was formed comprising  
43  
44 the practice manager, a senior nurse and a medical lead. However, several changes to routines (such  
45  
46 as temperature testing all patients) were later overturned by regional leaders on cost grounds.  
47  
48  
49

50  
51 In the early months of the pandemic, contractor GPs in one practice felt the practice leadership was  
52  
53 not "taking it seriously enough" (de-identified N). Following a formal presentation of the non-owner  
54  
55 GPs' concerns to management, the practice transformed to become more collaborative, with weekly  
56  
57 meetings and extensive use of social media for communication. However, nurses and administrative  
58  
59 staff remained isolated from decision making:  
60

1  
2  
3 A: No, the weekly meetings are not everyone. They're just the GPs. They do a Zoom meeting  
4  
5 now.

6  
7  
8 Q: But not with you?  
9

10 A: No, not with us. So that's what I'm saying, we just get things told to us in the corridor.

11  
12  
13 (de-identified participant N)  
14  
15

## 16 DISCUSSION

17  
18 Despite Melbourne's pandemic experience being the worst in Australia in 2020, practices were  
19 spared the staff deaths or multiple practice closures experienced overseas. The study practices  
20 mirrored international transformations of clinical, organizational and infection control routines. As  
21 elsewhere, PPE was difficult to access,<sup>26</sup> practice income fell<sup>27</sup> and practitioners worried about  
22 reduced face-to-face consultation<sup>28</sup> and the potential impact on patients with chronic health  
23 conditions.<sup>29</sup>

24  
25 Unanticipated crises, like a pandemic, can uncover the strengths, flexibility and fragility of  
26 organizations and the systems in which they are embedded.<sup>7</sup> The pandemic acted as a  
27 natural experiment of the effectiveness of models of care predominant in Australian  
28 general practice. We believe our data emphasises the fragility of the organizational models,  
29 financial security and support underpinning Australian primary care.  
30  
31

### 32 Models of care

33  
34 Our study data highlighted the potential of the CHC model to bridge the gap between primary care  
35 and public health.<sup>30</sup> Victoria's CHCs incorporate a focus on prevention, health equity and the social  
36 determinants of health.<sup>31</sup> The combination of the CHC's community focus and secure state funding  
37 helped it meet its mandate of addressing the evolving needs of local communities. By contrast, most  
38 of the private practices lacked the structural or organizational ability to go much beyond maintaining  
39 basic practice functions. They were isolated, internally preoccupied and, while provided with  
40  
41  
42  
43  
44  
45  
46  
47  
48  
49  
50  
51  
52  
53  
54  
55  
56  
57  
58  
59  
60

1  
2  
3 extensive information, generally left to negotiate the challenges of the pandemic alone. SE2's  
4  
5 remote governance and lack of internal management compounded workforce fragmentation and  
6  
7 demoralisation, and made it difficult for the practice to align with evolving demands. Practice W was  
8  
9 a partial exception, as its size, active leadership and community connection was reflected in the  
10  
11 decision to host a federally funded COVID-19 testing facility.  
12  
13

14  
15 The relative financial security of the CHC funding model and the explicit links with state health  
16  
17 services highlighted the potential of the CHC to address local needs of vulnerable communities.  
18  
19 Models similar to CHCs are widespread in North America and have been important in delivering  
20  
21 quality care to underserved populations.<sup>32</sup> Given the disproportionate impact of the pandemic on  
22  
23 vulnerable communities, and the importance of primary care to population health, future health  
24  
25 planning should explore the potential for either expanding the coverage of the CHC model or  
26  
27 exploring ways to incentivise the incorporation of CHC-like functions into private primary care  
28  
29 delivery.  
30  
31  
32

### 33 **Financial security**

34  
35  
36 As elsewhere,<sup>33-35</sup> all our participating practices were financially challenged by the pandemic. A  
37  
38 recent survey found that 65% of Australian GPs, particularly in urban and more affluent areas,  
39  
40 experienced reduced income in the early months of the pandemic.<sup>36</sup> Similar early financial impacts  
41  
42 were reported in many other nations,<sup>37 38 39</sup> with losses per FTE physician in the USA estimated as  
43  
44 over \$65,000 in 2020. Waitzberg observed that dramatically decreased income from patient visits  
45  
46 combined with minimal direct governmental control "reverses the conventional financial positions  
47  
48 of payers and providers and acts as a further hurdle to prioritizing public health".<sup>37</sup>  
49  
50  
51

52  
53 Given the fee for service payment model for GPs in private businesses and the CHC, our participants  
54  
55 unsurprisingly had a preoccupation with financial security and modifying routines to maintain  
56  
57 income and avoid practice closures. This challenge could have been addressed by directed  
58  
59 government financial support.  
60



1  
2  
3 Some degree of practice-directed financial support could be considered in future pandemics. Even  
4 relatively small capitated payments from payers (i.e. the federal government in Australia) could be  
5 used to mitigate losses and keep practices open.<sup>40</sup>  
6  
7  
8  
9

### 10 **Leading change at the practice level**

11  
12 It has been suggested that COVID-19 highlights the weak points in systems, but also provides an  
13 opportunity for transformation.<sup>41</sup> While practices in this study were all able to realign their  
14 organizational and clinical routines, transformation was constrained by hierarchical leadership  
15 structures, rigid financial models and pervasive professional boundaries.  
16  
17

18  
19 As others have found, our data identified isolated examples of increased collaboration,<sup>42</sup> and, at  
20 times (especially within the CHC) evidence of visionary, operational, and distributed leadership.<sup>43</sup>  
21 However, overall our data supported Gerada's contention that practices can both "crave" for  
22 authoritative leaders at times of distress, but also find such approaches to be disempowering.<sup>44</sup>  
23 Practice models and financing provided minimal incentives for leaders to be attentive to the local  
24 environment,<sup>16</sup> or open to creating links between organizations.<sup>45</sup>  
25  
26  
27  
28  
29  
30  
31  
32  
33  
34  
35

### 36 **Limitations**

37  
38 While data was collected from a range of organizational models, these were within a single  
39 Australian metropolitan area in the first year of a moderate COVID-19 pandemic. It is  
40 feasible that different routines would have emerged in practices in a different health policy  
41 or local environment context, such as rural practices, those not faced by a metropolitan  
42 area lockdown, and with no association with a University Department of General Practice.  
43  
44  
45  
46  
47  
48  
49

50 While it was possible that key routines were not revealed, our external investigators,  
51 iterative approach and inclusion of international experts decreased this possibility.  
52  
53  
54  
55

56 The GP investigators were involved in recruitment and data collection in their practice, and were  
57 closely involved in data analysis. Their views are inevitably influenced by their personal experiences  
58  
59  
60

1  
2  
3 of practice dynamics. This adds important insights into practice functioning, but also has the  
4  
5 potential to override the views of other practice participants. This possibility is countervailed by two  
6  
7 key factors. 1) The vast majority of data analysis, including all coding of data, was undertaken by the  
8  
9 social scientists. 2) Feedback sessions by practice staff on interim data provided member-checking of  
10  
11 data validity.  
12  
13  
14

## 15 **Conclusion**

16  
17  
18 Our study represented a natural experiment of the resilience, financial stability and governance  
19  
20 within models of primary care in Australia. We found a fragile primary care sector that struggled to  
21  
22 be fit for purpose in dealing with a pandemic. Practice isolation and financial strain were early and  
23  
24 pervasive challenges to practice security. Leadership was critical, but many routine changes followed  
25  
26 both financial and clinical priorities. Nevertheless, innovations in telehealth, triage and infection  
27  
28 management are likely to be long lasting.  
29  
30  
31

32  
33 The Australian federal government's 10-year vision for improving primary care<sup>46</sup> highlights the  
34  
35 importance of leadership at all levels and reconsideration of federal and state responsibilities in  
36  
37 supporting general practices. Our findings point to the potential value of models such as the CHC for  
38  
39 organizing and delivering care to highly vulnerable populations, and to the key role of practice  
40  
41 leaders. The significant financial burdens experienced by several practices raises concerns as to the  
42  
43 abilities of a purely fee for service system to both innovate and manage the critical primary care  
44  
45 challenges of a global pandemic.  
46  
47  
48

49  
50 **Acknowledgments** We acknowledge the contributions of Sharon Clifford, Project Manager, who  
51  
52 helped coordinate the study and John Furler, a clinician at one site.  
53  
54

55  
56 **Contributors** GR led the project. GR, ES, JN, KA, TS-S and SH acted as participant investigators. BFC  
57  
58 and WLM provided expert advice. JA and RL conducted and coded interviews and led data analysis.  
59  
60

This paper was written by GR, JA, and RL with contributions from TS-S, ES, JN, SH, BFC, WLM and KA.

All authors contributed to study design and approved the final manuscript.

Competing Interests None declared.

**Funding** This research received no specific grant from any funding agency in the public, commercial or not-for-profit sectors.

**Data sharing** No additional data available.

**Ethics approval** Monash University Human Research Ethics Committee #2020-23950.

## References

1. Hick JL, Biddinger PD. Novel Coronavirus and Old Lessons — Preparing the Health System for the Pandemic. *New England Journal of Medicine*. 2020/05/14 2020;382(20):e55.  
doi:10.1056/NEJMp2005118
2. Huston P, Campbell J, Russell G, et al. COVID-19 and primary care in six countries. *BJGP Open*. Sep 8 2020;doi:10.3399/bjgpopen20X101128
3. Braithwaite J, Tran Y, Ellis LA, Westbrook J. The 40 health systems, COVID-19 (40HS, C-19) study. *Int J Qual Health Care*. Feb 20 2021;33(1)doi:10.1093/intqhc/mzaa113
4. Boroujeni M, Saberian M, Li J. Environmental impacts of COVID-19 on Victoria, Australia, witnessed two waves of Coronavirus. *Environ Sci Pollut Res Int*. Mar 2021;28(11):14182-14191.  
doi:10.1007/s11356-021-12556-y
5. Erny-Albrecht K, Bywood P. *Corporatisation of general practice – impact and implications*. 2016:1-53. *PHCRIS Policy Issue Review*.
6. McDonald J, Ward B, Lane R, et al. How are co-located primary health care centres integrating care for people with chronic conditions? *International Journal of Integrated Care*. 2017;17(3)doi:10.5334/ijic.3163

- 1  
2  
3 7. Carmeli A, Schaubroeck J. Crisis-Preparedness: The Importance of Learning from Failures.  
4  
5 *Long Range Planning*. 2008/04/01/ 2008;41(2):177-196. doi:<https://doi.org/10.1016/j.lrp.2008.01.001>  
6
- 7 8. Plsek PE, Greenhalgh T. Complexity science: The challenge of complexity in health care.  
8  
9 *BMJ*. 2001;323(7313):625-8.  
10
- 11 9. Miller WL, Crabtree BF, McDaniel R, Stange KC. Understanding change in primary care  
12  
13 practice using complexity theory. *J Fam Pract*. May 1998;46(5):369-76.  
14
- 15 10. Yin R. *Case study research: Design and methods (3rd ed.)*. Sage; 2003.  
16
- 17 11. van Buul LW, Sikkens JJ, van Agtmael MA, Kramer MHH, van der Steen JT, Hertogh CMPM.  
18  
19 Participatory action research in antimicrobial stewardship: a novel approach to improving antimicrobial  
20  
21 prescribing in hospitals and long-term care facilities. *Journal of Antimicrobial Chemotherapy*.  
22  
23 2014;69(7):1734-1741. doi:10.1093/jac/dku068  
24
- 25 12. Russell G, Advocat J, Lane R, et al. How do general practices respond to a pandemic?  
26  
27 Protocol for a prospective qualitative study of six Australian practices. *BMJ Open*. 01-Sep-2021  
28  
29 2021;11(9):e046086. doi:10.1136/bmjopen-2020-046086  
30  
31
- 32 13. Balasubramanian BA, Chase SM, Nutting PA, et al. Using Learning Teams for Reflective  
33  
34 Adaptation (ULTRA): Insights From a Team-Based Change Management Strategy in Primary Care.  
35  
36 *Ann Fam Med*. September 1, 2010 2010;8(5):425-432. doi:10.1370/afm.1159  
37  
38
- 39 14. Lane R, Russell G, Bardoel EA, et al. When colocation is not enough: a case study of  
40  
41 General Practitioner Super Clinics in Australia. *Aust J Prim Health*. Aug 17  
42  
43 2016;doi:10.1071/PY16039  
44
- 45 15. *NVivo qualitative data analysis software. Version 12*. 2018.  
46
- 47 16. Miller WL, Crabtree BF, Nutting PA, Stange KC, Javón CR. Primary Care Practice  
48  
49 Development: A Relationship-Centered Approach. *The Annals of Family Medicine*. May 1, 2010  
50  
51 2010;8(Suppl 1):S68-S79. doi:10.1370/afm.1089  
52
- 53 17. Glaser BG. The Constant Comparative Method of Qualitative Analysis. *Social Problems*.  
54  
55 1965;12(4):436-445. doi:10.2307/798843  
56  
57  
58  
59  
60

- 1  
2  
3 18. Russell G, Advocat J, Geneau R, et al. Examining organizational change in primary care  
4 practices: experiences from using ethnographic methods. *Fam Pract*. Dec 1 2011;doi:cmr117 [pii]  
5  
6 10.1093/fampra/cmr117  
7  
8  
9  
10 19. Strauss AL. *Basics of qualitative research : techniques and procedures for developing*  
11 *grounded theory*. 2nd ed. ed. Thousand Oaks : Sage Publications; 1998.  
12  
13  
14 20. Miles MB, Huberman AM, Saldana J. *Qualitative data analysis : a methods sourcebook*. Third  
15 edition. ed. Thousand Oaks, California : SAGE Publications, Inc.; 2014.  
16  
17  
18 21. Tong A, Sainsbury P, Craig J. Consolidated criteria for reporting qualitative research  
19 (COREQ): a 32-item checklist for interviews and focus groups. *Int J Qual Health Care*. Dec  
20 2007;19(6):349-57. doi:10.1093/intqhc/mzm042  
21  
22  
23  
24 22. Australian Broadcasting Commission. Melbourne placed under stage 4 coronavirus lockdown,  
25 stage 3 for rest of Victoria as state of disaster declared. ABC. Accessed 13/02/2022, Melbourne  
26 placed under stage 4 coronavirus lockdown, stage 3 for rest of Victoria as state of disaster declared  
27  
28  
29  
30 23. Australian Government: Treasury. JobKeeper Payment. Commonwealth of Australia.  
31 Accessed 13/02/2022, <https://treasury.gov.au/coronavirus/jobkeeper>  
32  
33  
34 24. Australian Government: Department of Health. Primary Health Networks. Commonwealth of  
35 Australia. Accessed 12/02/2022, <https://www.health.gov.au/initiatives-and-programs/phn>  
36  
37  
38 25. Australian Broadcasting Commission. Postcode data on coronavirus cases reveals Victoria's  
39 COVID-19 hotspots. 12/02/2022, Postcode data on coronavirus cases reveals Victoria's COVID-19  
40 hotspots  
41  
42  
43  
44  
45 26. Alsnes IV, Munkvik M, Flanders WD, Oyane N. How well did Norwegian general practice  
46 prepare to address the COVID-19 pandemic? *Fam Med Community Health*. Dec  
47 2020;8(4)doi:10.1136/fmch-2020-000512  
48  
49  
50  
51 27. Roehr B. Covid-19 is threatening the survival of US primary care. *BMJ*. Jun 22  
52 2020;369:m2333. doi:10.1136/bmj.m2333  
53  
54  
55  
56  
57  
58  
59  
60

- 1  
2  
3 28. Xu Z, Fan J, Ding J, et al. The Impact of COVID-19 on Primary Care General Practice  
4 Consultations in a Teaching Hospital in Shanghai, China. *Front Med (Lausanne)*. 2021;8:642496.  
5  
6 doi:10.3389/fmed.2021.642496  
7  
8  
9 29. Rawaf S, Allen LN, Stigler FL, et al. Lessons on the COVID-19 pandemic, for and by primary  
10 care professionals worldwide. *Eur J Gen Pract*. Dec 2020;26(1):129-133.  
11  
12 doi:10.1080/13814788.2020.1820479  
13  
14  
15 30. Russell GM. Is prevention unbalancing general practice? *Med J Aust*. Jul 18  
16 2005;183(2):104-5.  
17  
18  
19 31. Powell Davies G, McDonald J, Jeon Y, Krastev Y, Christl B, Faruqi N. *A narrative synthesis of*  
20 *models of integrated primary care centres/polyclinics*. 2009.  
21  
22  
23 32. Nagel DA, Keeping-Burke L, Pyrke RJL, et al. Frameworks for evaluation of community health  
24 centers' services and outcomes: a scoping review protocol. *JBI Database System Rev Implement*  
25 *Rep*. Apr 2019;17(4):451-460. doi:10.11124/JBISRIR-2017-003843  
26  
27  
28 33. Wilson G, Currie O, Bidwell S, et al. Empty waiting rooms: the New Zealand general practice  
29 experience with telehealth during the COVID-19 pandemic. *N Z Med J*. Jul 9 2021;134(1538):89-101.  
30  
31  
32 34. Filippi MK, Callen E, Wade A, et al. COVID-19's Financial Impact on Primary Care Clinicians  
33 and Practices. *J Am Board Fam Med*. May-Jun 2021;34(3):489-497.  
34  
35  
36 doi:10.3122/jabfm.2021.03.200502  
37  
38  
39 35. Krist AH, DeVoe JE, Cheng A, Ehrlich T, Jones SM. Redesigning Primary Care to Address  
40 the COVID-19 Pandemic in the Midst of the Pandemic. *Ann Fam Med*. Jul 2020;18(4):349-354.  
41  
42  
43 doi:10.1370/afm.2557  
44  
45  
46 36. Scott A. The impact of COVID-19 on GPs and non-GP specialists in private practice.  
47 Melbourne Institute of Applied Economic and Social Research; 2020. p. 1-20.  
48  
49  
50 37. Waitzberg R, Quentin W, Webb E, Glied S. The Structure and Financing of Health Care  
51 Systems Affected How Providers Coped With COVID-19. *The Milbank quarterly*. 2021;99(2):542-564.  
52  
53  
54 doi:10.1111/1468-0009.12530  
55  
56  
57  
58  
59  
60

- 1  
2  
3 38. Kippen R, O'Sullivan B, Hickson H, Leach M, Wallace G. A national survey of COVID-19  
4 challenges, responses and effects in Australian general practice. *Aust J Gen Pract*. Nov  
5 2020;49(11):745-751. doi:10.31128/ajgp-06-20-5465  
6  
7  
8  
9 39. Roth C, Breckner A, Moellinger S, et al. Beliefs and practices among primary care physicians  
10 during the first wave of the COVID-19 pandemic in Baden-Wuerttemberg (Germany): an observational  
11 study. *BMC Fam Pract*. May 6 2021;22(1):86. doi:10.1186/s12875-021-01433-9  
12  
13  
14  
15 40. Basu S, Phillips RS, Phillips R, Peterson LE, Landon BE. Primary Care Practice Finances In  
16 The United States Amid The COVID-19 Pandemic. *Health Aff (Millwood)*. Sep 2020;39(9):1605-1614.  
17 doi:10.1377/hlthaff.2020.00794  
18  
19  
20  
21  
22 41. Friedman TL. We Need Great Leadership Now, and Here's What It Looks Like. *New York*  
23 *Times*. April 21, 2020. [https://www.nytimes.com/2020/04/21/opinion/covid-dov-](https://www.nytimes.com/2020/04/21/opinion/covid-dov-seidman.html?referringSource=articleShare)  
24 [seidman.html?referringSource=articleShare](https://www.nytimes.com/2020/04/21/opinion/covid-dov-seidman.html?referringSource=articleShare)  
25  
26  
27  
28 42. Renaa T, Brekke M. Restructuring in a GP practice during the COVID-19 pandemic - a focus-  
29 group study. *Tidsskr Nor Laegeforen*. Feb 2 2021;141(2)Driftsomlegging ved et fastlegekontor under  
30 covid-19-pandemien - en fokusgruppestudie. doi:10.4045/tidsskr.20.0713  
31  
32  
33  
34 43. Donahue KE, Halladay JR, Wise A, et al. Facilitators of transforming primary care: a look  
35 under the hood at practice leadership. *Ann Fam Med*. May-Jun 2013;11 Suppl 1:S27-33.  
36 doi:10.1370/afm.1492  
37  
38  
39  
40 44. Gerada C. Reflections on leadership during the Covid pandemic. *Postgrad Med*. Sep  
41 2021;133(7):717-720. doi:10.1080/00325481.2021.1903218  
42  
43  
44  
45 45. Westfall JM, Liaw W, Griswold K, et al. Uniting Public Health and Primary Care for Healthy  
46 Communities in the COVID-19 Era and Beyond. x. *J Am Board Fam Med*.  
47 2021;34(Supplement):S203. doi:10.3122/jabfm.2021.S1.200458  
48  
49  
50  
51 46. Commonwealth of Australia (Department of Health). Consultation Draft - Future focused  
52 primary health care: Australia's Primary Health Care 10 Year Plan 2022-2032. Commonwealth of  
53 Australia. Accessed 12/02/2022,  
54  
55  
56  
57

58 **Figure legend** Figure 1 COVID-19 in Victoria during 2020. Data Collection Timeline  
59  
60

1  
2  
3  
4  
5  
6  
7  
8  
9  
10  
11  
12  
13  
14  
15  
16  
17  
18  
19  
20  
21  
22  
23  
24  
25  
26  
27  
28  
29  
30  
31  
32  
33  
34  
35  
36  
37  
38  
39  
40  
41  
42  
43  
44  
45  
46  
47  
48  
49  
50  
51  
52  
53  
54  
55  
56  
57  
58  
59  
60

For peer review only



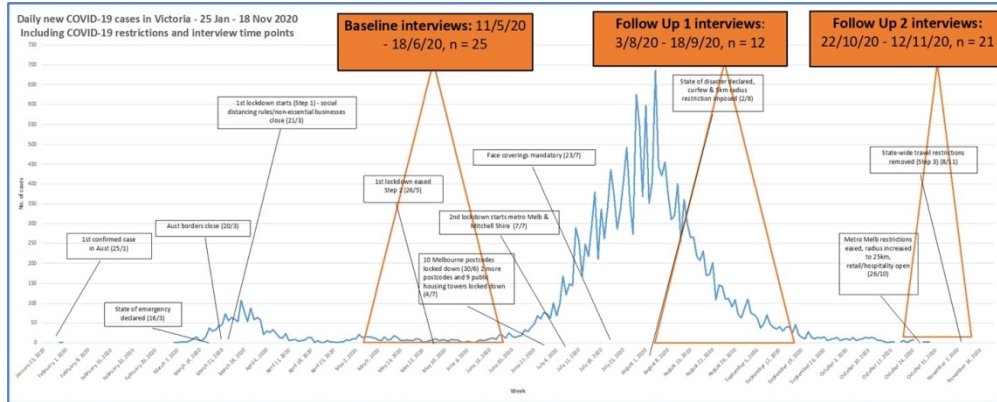

Figure 1 COVID-19 in Victoria during 2020. Data Collection Timeline

246x99mm (150 x 150 DPI)

## COREQ (COnsolidated criteria for REporting Qualitative research) Checklist

A checklist of items that should be included in reports of qualitative research. You must report the page number in your manuscript where you consider each of the items listed in this checklist. If you have not included this information, either revise your manuscript accordingly before submitting or note N/A.

| Topic                                          | Item No. | Guide Questions/Description                                                                                                                              | Reported on Page No. |
|------------------------------------------------|----------|----------------------------------------------------------------------------------------------------------------------------------------------------------|----------------------|
| <b>Domain 1: Research team and reflexivity</b> |          |                                                                                                                                                          |                      |
| <i>Personal characteristics</i>                |          |                                                                                                                                                          |                      |
| Interviewer/facilitator                        | 1        | Which author/s conducted the interview or focus group?                                                                                                   |                      |
| Credentials                                    | 2        | What were the researcher's credentials? E.g. PhD, MD                                                                                                     |                      |
| Occupation                                     | 3        | What was their occupation at the time of the study?                                                                                                      |                      |
| Gender                                         | 4        | Was the researcher male or female?                                                                                                                       |                      |
| Experience and training                        | 5        | What experience or training did the researcher have?                                                                                                     |                      |
| <i>Relationship with participants</i>          |          |                                                                                                                                                          |                      |
| Relationship established                       | 6        | Was a relationship established prior to study commencement?                                                                                              |                      |
| Participant knowledge of the interviewer       | 7        | What did the participants know about the researcher? e.g. personal goals, reasons for doing the research                                                 |                      |
| Interviewer characteristics                    | 8        | What characteristics were reported about the interviewer/facilitator? e.g. Bias, assumptions, reasons and interests in the research topic                |                      |
| <b>Domain 2: Study design</b>                  |          |                                                                                                                                                          |                      |
| <i>Theoretical framework</i>                   |          |                                                                                                                                                          |                      |
| Methodological orientation and Theory          | 9        | What methodological orientation was stated to underpin the study? e.g. grounded theory, discourse analysis, ethnography, phenomenology, content analysis |                      |
| <i>Participant selection</i>                   |          |                                                                                                                                                          |                      |
| Sampling                                       | 10       | How were participants selected? e.g. purposive, convenience, consecutive, snowball                                                                       |                      |
| Method of approach                             | 11       | How were participants approached? e.g. face-to-face, telephone, mail, email                                                                              |                      |
| Sample size                                    | 12       | How many participants were in the study?                                                                                                                 |                      |
| Non-participation                              | 13       | How many people refused to participate or dropped out? Reasons?                                                                                          |                      |
| <i>Setting</i>                                 |          |                                                                                                                                                          |                      |
| Setting of data collection                     | 14       | Where was the data collected? e.g. home, clinic, workplace                                                                                               |                      |
| Presence of non-participants                   | 15       | Was anyone else present besides the participants and researchers?                                                                                        |                      |
| Description of sample                          | 16       | What are the important characteristics of the sample? e.g. demographic data, date                                                                        |                      |
| <i>Data collection</i>                         |          |                                                                                                                                                          |                      |
| Interview guide                                | 17       | Were questions, prompts, guides provided by the authors? Was it pilot tested?                                                                            |                      |
| Repeat interviews                              | 18       | Were repeat interviews carried out? If yes, how many?                                                                                                    |                      |
| Audio/visual recording                         | 19       | Did the research use audio or visual recording to collect the data?                                                                                      |                      |
| Field notes                                    | 20       | Were field notes made during and/or after the interview or focus group?                                                                                  |                      |
| Duration                                       | 21       | What was the duration of the interviews or focus group?                                                                                                  |                      |
| Data saturation                                | 22       | Was data saturation discussed?                                                                                                                           |                      |
| Transcripts returned                           | 23       | Were transcripts returned to participants for comment and/or                                                                                             |                      |

| Topic                                  | Item No. | Guide Questions/Description                                                                                                        | Reported on Page No. |
|----------------------------------------|----------|------------------------------------------------------------------------------------------------------------------------------------|----------------------|
|                                        |          | correction?                                                                                                                        |                      |
| <b>Domain 3: analysis and findings</b> |          |                                                                                                                                    |                      |
| <i>Data analysis</i>                   |          |                                                                                                                                    |                      |
| Number of data coders                  | 24       | How many data coders coded the data?                                                                                               |                      |
| Description of the coding tree         | 25       | Did authors provide a description of the coding tree?                                                                              |                      |
| Derivation of themes                   | 26       | Were themes identified in advance or derived from the data?                                                                        |                      |
| Software                               | 27       | What software, if applicable, was used to manage the data?                                                                         |                      |
| Participant checking                   | 28       | Did participants provide feedback on the findings?                                                                                 |                      |
| <i>Reporting</i>                       |          |                                                                                                                                    |                      |
| Quotations presented                   | 29       | Were participant quotations presented to illustrate the themes/findings?<br>Was each quotation identified? e.g. participant number |                      |
| Data and findings consistent           | 30       | Was there consistency between the data presented and the findings?                                                                 |                      |
| Clarity of major themes                | 31       | Were major themes clearly presented in the findings?                                                                               |                      |
| Clarity of minor themes                | 32       | Is there a description of diverse cases or discussion of minor themes?                                                             |                      |

Developed from: Tong A, Sainsbury P, Craig J. Consolidated criteria for reporting qualitative research (COREQ): a 32-item checklist for interviews and focus groups. *International Journal for Quality in Health Care*. 2007. Volume 19, Number 6: pp. 349 – 357

**Once you have completed this checklist, please save a copy and upload it as part of your submission. DO NOT include this checklist as part of the main manuscript document. It must be uploaded as a separate file.**
